# Supplementary material for: The geodynamics of plume-influenced mid-ocean ridges: insights from the Foundation Segment of the Pacific-Antarctic Ridge
Source: Frontiers journal article supplement (doi:10.3389/feart.2024.1456429), 2024-09-30
Supplement: Table_1.xlsx [file Table_1.xlsx]

## Sheet: S1 – SO213 data
Sample	SO213 10VSRa	SO213 10VSRb	SO213 1VSRb	SO213 2VSRa	SO213 2VSRb	SO213 3VSRa	SO213 3VSRb	SO213 4VSR-a	SO213 4VSR-b	SO213 5VSRb	SO213 7VSR a	SO213 8VSRb	SO213 9VSRa	SO213 DR10-1	SO213 DR10-2	SO213 DR10-4	SO213 DR10-5	SO213 DR2-1-a	SO213 DR2-1-b	SO213 DR2-2-a	SO213 DR2-2-b	SO213 DR3-1	SO213 DR3-2	SO213 DR3-3-b	SO213 DR3-4	SO213 DR5-1	SO213 DR5-4	SO213 DR6-1	SO213 DR6-2	SO213 DR6-3	SO213 DR6-4	SO213 DR6-5	SO213 DR7a-1	SO213 DR7a-2	SO213 DR7a-3	SO213 DR7a-4	SO213 DR8a-1-a	SO213 DR8a-3-a	SO213 DR8a-5	SO213 DR9-1	SO213 DR9-3-a	SO213 DR9-3-b
Location	Axis	Axis	N Overlaper	N Overlaper	N Overlaper	N Overlaper	N Overlaper	N Overlaper	N Overlaper	N Overlaper	Axis	Axis	Axis	Ridge SW' Planck	Ridge SW' Planck	Ridge SW' Planck	Ridge SW' Planck	Westerly Smts.	Westerly Smts.	Westerly Smts.	Westerly Smts.	Westerly Smts.	Westerly Smts.	Westerly Smts.	Westerly Smts.	Westerly Smts.	Westerly Smts.	Westerly Smts.	Westerly Smts.	Westerly Smts.	Westerly Smts.	Westerly Smts.	Ridge SE' Richter	Ridge SE' Richter	Ridge SE' Richter	Ridge SE' Richter	Ridge SW' Richter	Ridge SW' Richter	Ridge SW' Richter	Ridge SW' Richter	Ridge SW' Planck	Ridge SW' Planck
Locality	PAR axis	PAR axis	PAR axis	PAR axis	PAR axis	PAR axis	PAR axis	PAR axis	PAR axis	PAR axis	PAR	PAR	PAR	FSC	FSC	FSC	FSC	off-axis Smt.	off-axis Smt.	off-axis Smt.	off-axis Smt.	off-axis Smt.	off-axis Smt.	off-axis Smt.	off-axis Smt.	off-axis Smt.	off-axis Smt.	off-axis Smt.	off-axis Smt.	off-axis Smt.	off-axis Smt.	off-axis Smt.	FSC	FSC	FSC	FSC	FSC	FSC	FSC	FSC	FSC	FSC
Longitude [°E]	-111.276	-111.276	-110.877	-110.913	-110.913	-110.927	-110.927	-110.958	-110.958	-110.935	-111.191	-111.213	-111.243	-111.935	-111.935	-111.935	-111.935	-111.836	-111.836	-111.836	-111.836	-112.046	-112.046	-112.046	-112.046	-112.361	-112.361	-111.606	-111.606	-111.606	-111.606	-111.606	-113.196	-113.196	-113.196	-113.196	-112.797	-112.797	-112.797	-112.797	-112.156	-112.156
Latitude [°N]	-39.333	-39.333	-35.564	-35.709	-35.709	-35.858	-35.858	-35.9865	-35.9865	-36.197	-38.8608	-39.004	-39.176	-38.33	-38.33	-38.33	-38.33	-35.8493	-35.8493	-35.8493	-35.8493	-36.117	-36.117	-36.1171	-36.117	-36.304	-36.304	-36.175	-36.175	-36.175	-36.175	-36.175	-38.101	-38.101	-38.101	-38.101	-38.3172	-38.3172	-38.3172	-38.3172	-38.1705	-38.1705
WD [m]	2161	2161	2511	2489	2489	2453	2453	2492	2492	2461	2237	2272	2233	2591	2591	2591	2591	2352	2352	2352	2352	2854	2854	2854	2854	1488	1488	1928	1928	1928	1928	1928	2023	2023	2023	2023	2507	2507	2507	2507	2550	2550
Group	Andesite/Dacite	Andesite/Dacite	Basalt	Basalt	Basalt	Basalt	Basalt	Basalt	Basalt	Basalt	Andesite/Dacite	Basalt	Andesite/Dacite	Basalt	Basalt	Basalt	Basalt	Basalt	Basalt	Basalt	Basalt	Basalt	Basalt	Basalt	Basalt	Basalt	Basalt	Basalt	Basalt	Basalt	Basalt	Basalt	Basalt	Basalt	Basalt	Basalt	Basalt	Basalt	Basalt	Basalt	Basalt	Basalt
Cruise	SO213	SO213	SO213	SO213	SO213	SO213	SO213	SO213	SO213	SO213	SO213	SO213	SO213	SO213	SO213	SO213	SO213	SO213	SO213	SO213	SO213	SO213	SO213	SO213	SO213	SO213	SO213	SO213	SO213	SO213	SO213	SO213	SO213	SO213	SO213	SO213	SO213	SO213	SO213	SO213	SO213	SO213
Method	EMP; ICPMS; TIMS	EMP	EMP	EMP	EMP; ICPMS; TIMS	EMP; ICPMS; TIMS	EMP	EMP	EMP; ICPMS; TIMS	EMP; ICPMS	EMP; ICPMS; TIMS	EMP; ICPMS; TIMS	EMP; ICPMS; TIMS	XRF; ICPMS	XRF	XRF	XRF	EMP; ICPMS; TIMS	EMP	EMP; ICPMS; TIMS	EMP	XRF	XRF	EMP; ICPMS; TIMS	XRF	XRF	XRF; ICPMS; TIMS	XRF	XRF; ICPMS; TIMS	XRF	XRF	XRF	XRF; ICPMS	XRF	XRF	XRF	EMP	EMP; ICPMS; TIMS	XRF; ICPMS	XRF; ICPMS	EMP	EMP; ICPMS; TIMS
Material	Gl	Gl	Gl	Gl	Gl	Gl	Gl	Gl	Gl	Gl	Gl	Gl	Gl	WR	WR	WR	WR	Gl	Gl	Gl	Gl	WR	WR	Gl	WR	WR	WR	WR	WR	WR	WR	WR	WR	WR	WR	WR	Gl	Gl	WR	WR	Gl	Gl
SiO2 [wt.%]	60.98	59.69	49.74	50.63	50.54	50.53	50.57	49.48	49.41	50.92	60	50.82	59.67	50.01	50.13	50.35	50.58	49.97	49.45	49.09	49.59	47.73	48.03	48.47	48.45	47.99	47.28	48.9	49.93	48.97	46.55	48.61	49.3	48.79	48.53	49.09	48.03	48.52	50.5	48.83	48.85	48.31
TiO2 [wt.%]	1.63	1.65	1.6	1.24	1.23	1.57	1.57	1.78	1.82	1.54	1.66	1.79	1.65	1.48	1.47	1.49	1.41	1.69	1.65	1.67	1.67	1.27	1.29	1.2	1.9	2.14	1.3	1.37	1.58	1.36	1.05	1.35	1.29	1.29	1.44	1.46	1.97	2.01	2.06	1.24	1.26	1.21
Al2O3 [wt.%]	13.07	12.88	14.56	15.21	15.37	14.57	14.51	15.47	15.35	14.37	12.95	14.18	12.9	14.95	14.89	14.87	14.67	14.72	14.7	14.7	14.73	17.44	17.6	16.95	16.98	15.89	22.89	16.49	15.37	16.41	21.44	16.29	16.03	15.61	15.37	15.6	13.87	14.1	15.24	16.68	16.53	16.22
FeOt [wt.%]	11.36	11.55	10.61	9.04	8.88	10.36	10.18	9.89	9.9	10.41	11.76	11.57	11.2	11.26*	11.4*	10.99*	11.1*	10.12	10.03	10.01	9.99	10.32*	9.61*	8.65	10.47*	11.32*	6.78*	9.46*	9.90*	9.68*	9.14*	9.16*	9.75*	9.39*	9.50*	9.80*	10.22	10.84	9.95*	11.29*	10.63	9.97
Fe2O3t [wt.%]														12.5139	12.6695	12.2138	12.3361					11.4692	10.6802		11.6359	12.5806	7.53501	10.5134	11.0024	10.7579	10.1578	10.18	10.8357	10.4357	10.5579	10.8913			11.058	12.5472
MnO [wt.%]	0.2	0.21	0.21	0.18	0.17	0.22	0.21	0.18	0.2	0.2	0.22	0.22	0.21	0.182	0.188	0.19	0.188	0.2	0.19	0.19	0.2	0.16	0.16	0.16	0.16	0.178	0.112	0.153	0.157	0.158	0.154	0.119	0.152	0.153	0.163	0.153	0.18	0.21	0.187	0.171	0.21	0.17
MgO [wt.%]	1.76	1.82	7.44	8.27	8.48	7.58	7.57	7.38	7.38	7.45	1.86	6.83	2.05	6.73	6.73	6.74	6.67	7.38	7.39	7.33	7.33	8.12	8.48	8.92	5.59	5.95	4.78	6.66	6.91	7.8	4.7	6.46	7.14	7.86	7.29	7.43	6.07	6.49	5.51	8.08	8.02	7.88
CaO [wt.%]	5.29	5.35	11.92	12.77	12.62	12.06	11.91	11.57	11.61	12.02	5.45	11.44	5.65	12.62	12.56	12.59	12.43	11.89	11.87	11.88	11.85	12.35	12.4	11.86	12.17	11.58	13.62	12.98	12.71	12.68	13.43	13	13.14	13.65	13.72	13.01	10.39	11.09	12.22	11.04	10.88	10.43
Na2O [wt.%]	4.22	4.24	2.73	2.44	2.46	2.74	2.7	2.96	2.94	2.6	4.27	2.87	4.2	2.25	2.07	2.18	2.09	3.18	3.14	3.14	3.16	2.12	2.01	2.63	2.45	2.95	2.19	2.51	2.5	2.34	2.26	2.49	2.36	2.32	2.49	2.52	3.26	3.21	2.62	2.13	2.75	2.76
K2O [wt.%]	0.81	0.78	0.09	0.07	0.08	0.09	0.1	0.31	0.3	0.08	0.78	0.17	0.73	0.222	0.245	0.286	0.313	0.11	0.11	0.11	0.11	0.14	0.153	0.08	0.403	0.359	0.227	0.149	0.301	0.189	0.082	0.177	0.2	0.177	0.175	0.167	0.3	0.3	0.508	0.198	0.1	0.1
P2O5 [wt.%]	0.46	0.49	0.14	0.11	0.09	0.12	0.13	0.25	0.23	0.13	0.52	0.18	0.41	0.136	0.149	0.154	0.124	0.15	0.15	0.16	0.16	0.121	0.126	0.09	0.267	0.395	0.26	0.127	0.162	0.124	0.162	0.12	0.128	0.123	0.13	0.156	0.3	0.26	0.251	0.15	0.12	0.14
SO2 [wt.%]	0.1	0.11	0.19	0.15	0.15	0.18	0.18	0.17	0.17	0.18	0.12	0.21	0.12					0.19	0.21	0.19	0.19			0.16													0.2	0.21			0.17	0.17
Cl [wt.%]	0.54	0.52	0.02	0.01	0.01	0.01	0.01	0.01	0.01	0.02	0.52	0.02	0.5					0.01	0.01	0.01	0.01			0.03													0.01	0.01			0	0
LOI [wt.%]														0	0	0	0.27					0.06	0		0.97	1.05	0.39	1.02	0.3	0.11	0.87	2.04	0.33	0.43	1.01	0.44			0.78	0
Total [wt.%]	100.32	99.22	99.27	100.14	100.1	100.05	99.64	99.47	99.32	99.93	100.01	100.3	99.2	99.83	99.83	99.84	99.84	99.63	98.91	98.51	99.01	99.84	99.85	99.2	99.81	99.8	99.83	99.82	99.81	99.82	99.84	99.81	99.82	99.8	99.81	99.81	94.81	97.24	99.83	99.81	99.54	97.37
Li [ppm]	18		6.52		5.12	6.37			6.41	6.28	17.46	6.21	16.59	4.85				5.73		5.5				7.93			7.31		5.43				5					4.95	4.65	4.03		4.68
Sc [ppm]	20.73		47.9		45.09	48.15			43.17	47.61	21.27	47.08	22.03	47.25				49.7		49.94				40.45			25.94		46.33				45.95					46.67	47.27	34.07		34.03
V [ppm]	88.24		379.7		312.7	375.7			322.2	375.8	88.33	370.9	114.9	334	316	314	324	337		340.3		243	244	274	315	326	196.4	268	319.5	268	214	268	290.2	278	287	283		329.5	359.3	250.4		251.8
Cr [ppm]	2.51		197.2		418.4	228.2			291.3	198	2.31	98.3	4.29	216.3	204	209	154	360.2		348.2		289	299	311.7	274	261	215.1	339	351	333	238	329	373.4	357	308	310		214.3	93.99	398.8		447.9
Co [ppm]	19.9		46.69		45.88	46.24			44.04	45.32	20.46	48.49	21.54	50.66	37.1	47.5	40.1	43.91		48.37		45.9	40.7	46.27	29.7	38.2	27.13	38.6	50.37	32.1	49.8	55.2	45.93	79.6	31.2	40.1		49.01	66.98	49.79		48.89
Ni [ppm]	3.82		71.3		109.9	75.45			95.81	70.62	3.8	50.45	5.67	68.63	51.2	26.6	38.3	66.38		68.67		113	58.5	118.2	24.1	38.1	63.44	70.7	75.45	118	97.6	87.6	96.03	126	98.3	107		62.28	69.28	166.8		156.8
Cu [ppm]	26.51		79.27		88.69	79.1			73.18	77.17	27.17	77.29	30.39	85.61	92.4	35	105	92.58		93.61		43	7.7	84.93	14.2	84.7	47.97	25	100.5	87.4	83.6	70	109.7	77.7	80.1	121		85.26	98.63	73.46		70.87
Zn [ppm]	129.3		94.34		75.03	92.52			92.08	91.72	140	101.2	135.3	94.08	86.6	83.5	92	94.14		91.32		75.8	72.9	102.5	89.5	94.5	59.55	69.6	87.03	71.2	67.5	69.2	76	73.2	75.1	80.4		92.09	117.2	102.3		99.87
Ga [ppm]															15.6	16.4	16.9					12.5	14.5		17.9	18.5		13.4		15.1	14.8	12.9		14.3	14.4	14.8
Rb [ppm]	11.23		0.51		0.45	0.52			2.89	0.52	10.84	1.79	10.21	4.06	5.6	6.6	7	4.49		4.18		1.5	3.4	1.31	10.4	5.6	1.78	4.5	6.08	3.3	3.4	4.9	4.56	5	5.2	4.4		5.34	10.69	2.34		0.83
Sr [ppm]	118.5		109.7		118.5	115.2			157.9	114.6	121.9	145	118.7	137.9	131	131	122	159.2		156.7		148	147	161.9	217	247	403.7	249	158.5	144	186	301	151.3	153	170	162		136.7	230.3	199.9		190.7
Y [ppm]	135.3		34.79		25.85	34.59			37.19	33.83	135.3	34.11	127.2	29.43	31.2	30.9	32.7	32.81		33.09		26.9	28.7	25.38	38.5	40	20.84	28.9	30.06	28.7	23.1	29.8	26.45	32.1	32.6	32.8		28.98	36.16	23.9		23.68
Zr [ppm]	731.6		95.53		72.9	96.24			148.8	96.55	718.6	111.5	633.7	90.24	76.5	73.6	62.8	103.9		103.9		66.8	66.1	82.88	120	158	107.7	75.5	99.8	79.2	59.5	79	81.18	71.5	85.5	84.7		89.79	153	67.48		66.68
Nb [ppm]	20.88		1.98		1.6	2.06			8.23	2.09	21.03	5.28	20.01	3.07	4.5	2.9	2.9	3.18		3.13		2.3	2.6	3.24	9	10.8	5.84	3.1	3.04	5.6	3.6	2.5	1.57	2.6	3.1	5		3.08	10.31	2.67		2.57
Ba [ppm]	92.7		6.25		5.36	6.39			30.65	6.3	91.46	24.81	86.96	15.38	34.7	18.9	37.5	17.23		12.41		17.9	36.4	15.69	34.7	42.6	24.53	13.6	10.06	18.8	34.6	32.8	7.02		14.9	17.2		15.62	62.12	14.79		11.57
La [ppm]	30.28		3		2.48	3.09			7.6	3.22	29.97	5.3	26.41	3.76				3.9		3.9				3.65			6.16		3.72				2.82					3.72	9.32	2.98		2.95
Ce [ppm]	82.46		9.78		7.89	9.99			19.59	10.28	82.44	14.68	73.05	11.06				12.01		12.09				10.26			16.37		11.68				9.04					10.91	23.98	8.43		8.3
Pr [ppm]	11.87		1.72		1.36	1.76			2.87	1.77	11.85	2.3	10.53	1.81				2.04		2.06				1.68			2.39		2				1.55					1.79	3.48	1.36		1.33
Nd [ppm]	59.16		10.09		7.86	10.26			14.66	10.07	59.46	12.42	53.34	10.05				11.62		11.62				9.23			11.84		11.38				8.88					9.92	17.77	7.57		7.53
Sm [ppm]	16.6		3.58		2.72	3.59			4.4	3.51	16.76	3.96	15.34	3.35				3.87		3.88				2.95			3.18		3.73				3.03					3.25	5.09	2.68		2.61
Eu [ppm]	3.95		1.35		1.06	1.35			1.55	1.3	4.02	1.46	3.82	1.27				1.47		1.48				1.16			1.23		1.4				1.2					1.25	1.84	1.07		1.06
Gd [ppm]	21.91		5.41		4.07	5.41			6.18	5.25	22.11	5.64	20.31	4.84				5.54		5.57				4.22			4.06		5.2				4.41					4.77	6.74	4.01		3.91
Tb [ppm]	3.66		0.92		0.7	0.92			1.03	0.9	3.66	0.94	3.4	0.82				0.92		0.93				0.71			0.64		0.86				0.74					0.8	1.08	0.67		0.67
Dy [ppm]	24.39		6.35		4.79	6.36			6.9	6.21	24.3	6.32	22.78	5.52				6.16		6.22				4.73			4.07		5.78				5.04					5.42	6.98	4.54		4.45
Ho [ppm]	5.05		1.33		0.99	1.32			1.43	1.3	5.04	1.31	4.75	1.14				1.27		1.28				0.99			0.81		1.17				1.03					1.12	1.41	0.93		0.92
Er [ppm]	15.49		3.99		3	3.98			4.29	3.92	15.53	3.9	14.54	3.41				3.76		3.8				2.96			2.35		3.44				3.06					3.36	4.12	2.74		2.69
Tm [ppm]	2.22		0.56		0.42	0.56			0.61	0.55	2.21	0.54	2.09	0.47				0.52		0.53				0.41			0.32		0.48				0.43					0.47	0.56	0.38		0.37
Yb [ppm]	14.81		3.73		2.77	3.7			4.01	3.68	14.72	3.59	14.05	3.14				3.42		3.46				2.75			2.13		3.12				2.79					3.1	3.73	2.47		2.43
Lu [ppm]	2.19		0.55		0.41	0.56			0.6	0.55	2.19	0.53	2.08	0.47				0.51		0.51				0.41			0.32		0.46				0.41					0.46	0.55	0.37		0.36
Hf [ppm]	18.93		2.7		2.03	2.72			3.5	2.66	18.6	2.97	16.65	2.48				2.87		2.88				2.21			2.58		2.79				2.25					2.45	3.83	1.83		1.81
Ta [ppm]	1.3		0.14		0.11	0.14			0.5	0.15	1.29	0.33	1.23	0.2				0.21		0.21				0.22			0.38		0.21				0.11					0.2	0.63	0.17		0.17
Pb [ppm]	2.06		0.34		0.29	0.35			0.64	0.35	2	0.44	1.81	0.39				0.54		0.48				0.48			0.75		0.44				0.33					0.42	0.69	0.32		0.28
Th [ppm]	2.67		0.11		0.09	0.11			0.54	0.12	2.55	0.33	2.12	0.2				0.18		0.18				0.21			0.35		0.17				0.1					0.2	0.66	0.15		0.15
U [ppm]	0.96		0.05		0.04	0.05			0.2	0.05	0.92	0.11	0.76	0.11				0.1		0.12				0.23			0.18		0.17				0.05					0.1	0.37	0.08		0.06
87Sr/86Sr	0.702674				0.702482	0.702474			0.702515		0.702666	0.702612	0.702646					0.702582		0.702585				0.702682			0.702554		0.70256									0.702605				0.702536
143Nd/144Nd	0.513093				0.513111	0.513121			0.513096		0.513097	0.513082	0.513096					0.513094		0.513085				0.513026			0.513121		0.513126									0.513069				0.513088
206Pb/204Pb	18.7055				18.7411	18.7145			18.6493		18.6948	18.7979	18.707					18.8284		18.8355				19.1889			18.4062		18.4363									18.6639				18.4685
207Pb/204Pb	15.5337				15.5406	15.5367			15.5293		15.528	15.5423	15.5337					15.5431		15.5476				15.5777			15.4999		15.5052									15.5367				15.516
208Pb/204Pb	38.1233				38.1268	38.0884			37.9705		38.1022	38.2352	38.1215					38.2353		38.245				38.6035			37.7901		37.8545									38.0642				37.7739
	*calculated from Fe2O3t

## Sheet: S2 - Integrated dataset
Sample	Location	Group	Longitude [°E]	Latitude [°N]	WD [m]	Cruise	Reference(s)	Method	Material	SiO2 [wt.%]	TiO2 [wt.%]	Al2O3 [wt.%]	FeOt [wt.%]	Fe2O3t [wt.%]	FeO [wt.%]	Fe2O3 [wt.%]	MnO [wt.%]	MgO [wt.%]	CaO [wt.%]	Na2O [wt.%]	K2O [wt.%]	P2O5 [wt.%]	Cr2O3 [wt.%]	SO2 [wt.%]	Cl [wt.%]	H2O [wt.%]	LOI [wt.%]	Total [wt.%]	Li [µg g-1]	Sc [µg g-1]	V [µg g-1]	Cr [µg g-1]	Co [µg g-1]	Ni [µg g-1]	Cu [µg g-1]	Zn [µg g-1]	Mo [µg g-1]	Ga [µg g-1]	Rb [µg g-1]	Sr [µg g-1]	Y [µg g-1]	Zr [µg g-1]	Nb [µg g-1]	Sn [µg g-1]	Sb [µg g-1]	Cs [µg g-1]	Ba [µg g-1]	La [µg g-1]	Ce [µg g-1]
FH7-01	Rift	Failed Rift	-124.762	-35.3475	4843	Hotline (Atalante)	Maia et al., 2001	TIMS	Gl
FH7-03	Rift	Failed Rift	-124.762	-35.3475	4843	Hotline (Atalante)	Hekinian et al., 1999	EMP; ICPMS	Gl	49.71	2.67	13.38	13.17				0.23	6.84	10.57	2.04	0.14	0.25						99.01				226	46	132		156			8.15	106	61	188	6.74				15.1	7.22	20.6
FH7-16	Rift	Failed Rift	-124.762	-35.3475	4843	Hotline (Atalante)	Maia et al., 2001	TIMS	Gl
SO100 11DS4	Ampère	FSC >5 Ma	-130.762	-32.932	3116	SO100	Hekinian et a., 1997	ICPMS	WR	46.5	1.72	14.2	13.59		11.55	2.27	0.31	4.85	10	2.83	0.87	0.24					2.82	99.42			286	120	43	74					20	184	31.5	107	6.6				43	6	16
SO100 11DS-1 GLAS	Ampère	FSC >5 Ma	-130.758	-32.9402	3116	SO100	Haase (ME, unpubl.), Devey (TE, unpubl.); Maia et al., 2001 (Pb-Iso.)	EMP; ICPMS; TIMS	Gl	49.73	1.84	15.06	10.68				0.17	7.04	11.7	2.9	0.18	0.27	0.056	0.233	0.005			99.85					49.9873	64.8207	88.1854	104.449		19.6575	3.13835	196.062	34.9175	126.595	7.09806			0.0497274	34.7803	6.60849	17.6048
SO100 11DS-2	Ampère	FSC >5 Ma	-130.758	-32.9402	3116	SO100	Stroncik & Devey (2011) and Devey (unpubl.)	XRF	WR	49.66	1.956	15.59	10.4287	11.59			0.16	5.62	12.3	2.98	0.39	0.278						100.524
SO100 11DS-3 GLAS	Ampère	FSC >5 Ma	-130.758	-32.9402	3116	SO100	Stroncik & Devey (2011) and Devey (unpubl.)	XRF (ME: WR); ICPMS	Gl/WR	50.21	1.935	15.51	10.2397	11.38			0.16	6.28	12.14	2.997	0.36	0.233						101.205					49.0743	58.3612	80.4671	99.1366		18.5753	2.97759	187.544	32.5734	119.183	6.88296			0.0399277	32.3761	6.42203	17.3511
SO100 11DS-5	Ampère	FSC >5 Ma	-130.758	-32.9402	3116	SO100	Stroncik & Devey (2011) and Devey (unpubl.)	XRF	WR	48.62	2.042	16.26	10.8876	12.1			0.17	4.27	12.68	3.09	0.374	0.511						100.117
SO100 11DS-6	Ampère	FSC >5 Ma	-130.758	-32.9402	3116	SO100	Stroncik & Devey (2011) and Devey (unpubl.)	XRF	WR	47.9	2.019	16.26	11.8414	13.16			0.21	4.82	11.7	3.153	0.548	0.677						100.447
SO100 11DS-9	Ampère	FSC >5 Ma	-130.758	-32.9402	3116	SO100	Stroncik & Devey (2011) and Devey (unpubl.)	XRF	WR	49.42	1.873	15.08	9.69984	10.78			0.15	6.48	12.87	2.99	0.302	0.265						100.21
FH1-01	Aristoteles	FSC >5 Ma	-127.501	-32.5055	3200	Hotline (Atalante)	Hekinian et al., 1999; Maia et al., 2001	EMP; ICPMS; TIMS	Gl	52.19	3.44	12.31	13.83				0.34	3.73	7.9	2.35	0.72	0.62						97.45		42.12		42.1	43	21.09	38.79	187.69			7.72	258.85	84.57	411.79	22.91				97.53	23.52	60.68
FH1-02	Aristoteles	FSC >5 Ma	-127.501	-32.5055	3200	Hotline (Atalante)	Hekinian et al., 1999; Maia et al., 2001	ICPMS; TIMS	Gl																					46.38		38.5	45.9	21.64	38.3	193.13			7.91	269.21	88.73	428.3	24.14				98.47	23.76	60.95
SO100 13DS-1GLAS	Becquerel	FSC >5 Ma	-126.308	-32.4268	3095	SO100	Devey (unpubl.); Maia et al., 2001 (Pb-Iso.)	XRF (ME: WR); ICPMS; TIMS	Gl/WR	49.08	1.403	21.1	7.2164	8.02			0.12	3.53	13.67	2.869	0.296	0.266						100.354											4.60294	305.49	29.2307	147.204	11.0425			0.0694995	57.4183	8.90188	21.5224
SO100 13DS-2	Becquerel	FSC >5 Ma	-126.308	-32.4268	3095	SO100	Stroncik & Devey (2011) and Devey (unpubl.)	XRF	WR	49.79	1.59	18.5	8.26916	9.19			0.11	4.94	12.99	2.997	0.328	0.234						100.669
SO100 17DS-1GLAS	Becquerel	FSC >5 Ma	-126.068	-32.4746	2661	SO100	Haase (ME, unpubl.), Devey (TE, unpubl.); Maia et al., 2001 (Pb-Iso.)	EMP; ICPMS; TIMS	Gl	49.47	2.69	14.12	12.55				0.2	5.53	10.8	3.47	0.38	0.44	0.031	0.309	0.004			99.98											3.65598	334.308	37.3988	189.572	10.6075			0.0374632	62.1243	10.2173	26.6981
SO100 17DS-2	Becquerel	FSC >5 Ma	-126.068	-32.4746	2661	SO100	Stroncik & Devey (2011) and Devey (unpubl.)	XRF	WR	48.94	2.481	16.05	11.3375	12.6			0.17	4.42	11.57	3.27	0.624	0.446						100.571	10.4054	38.5983		60.481	42.6854	24.4414	58.9814	130.989		20.24	23.5127	327.581	40.0198	177.507	9.96837			2.49583	53.5865	10.5224	27.4928
SO100 17DS-3	Becquerel	FSC >5 Ma	-126.068	-32.4746	2661	SO100	Stroncik & Devey (2011) and Devey (unpubl.)	XRF	WR	49.47	2.549	15.57	11.2655	12.52			0.17	4.37	11.42	3.435	0.593	0.396						100.493
SO100 18DS-1GLAS	Becquerel	FSC >5 Ma	-126.008	-32.4812	3213	SO100	Haase (ME, unpubl.), Devey (TE, unpubl.)	EMP; ICPMS; TIMS	Gl	49.82	2.55	13.97	12.63				0.18	5.46	10.47	3.44	0.37	0.42	0.035	0.291	0.022			99.68											4.06076	329.916	35.0689	175.055	11.5763			0.0478392	60.1396	10.1208	25.3192
SO100 18DS-2GLAS	Becquerel	FSC >5 Ma	-126.008	-32.4812	3213	SO100	Stroncik & Devey (2011) and Devey (unpubl.)	XRF (ME: WR); ICPMS	Gl/WR	49.58	2.382	14.89	11.4635	12.74			0.18	5.01	11.39	3.306	0.546	0.405						100.429											4.19542	343.183	36.8202	180.83	11.84			0.0553661	63.6008	10.4591	26.4118
SO100 18DS-3	Becquerel	FSC >5 Ma	-126.008	-32.4812	3213	SO100	Stroncik & Devey (2011) and Devey (unpubl.)	XRF	WR	50.3	2.388	15.25	10.9686	12.19			0.21	5.04	11.57	3.328	0.476	0.393						101.145
SO100 18DS-4	Becquerel	FSC >5 Ma	-126.008	-32.4812	3213	SO100	Stroncik & Devey (2011) and Devey (unpubl.)	XRF	Gl	49.54	2.346	14.69	12.0213	13.36			0.21	4.91	11.11	3.46	0.61	0.352						100.588
SO100 28GTV-1	Buffon	FSC >5 Ma	-124.907	-33.6978	484	SO100	Stroncik & Devey (2011) and Devey (unpubl.); Maia et al. (2001)	XRF; ICPMS; TIMS	WR	48.99	2.595	16.05	9.14197	10.16			0.11	7.97	7.32	3.624	1.602	0.855						99.276	12.1549	17.6971		233.6	41.522	160.684	56.9488	103.155		18.2898	27.0377	574.673	35.3631	321.951	62.1939			0.140357	333.223	36.2562	69.3377
SO100 28GTV-2	Buffon	FSC >5 Ma	-124.907	-33.6978	484	SO100	Stroncik & Devey (2011) and Devey (unpubl.)	XRF	WR	49.33	2.574	16.06	9.26794	10.3			0.11	8.19	7.32	3.551	1.615	0.814						99.864
SO100 26DS-1	Celsius	FSC >5 Ma	-124.107	-33.5283	2500	SO100	Stroncik & Devey (2011) and Devey (unpubl.); Maia et al. (2001)	XRF; ICPMS; TIMS	WR	47.76	2.275	19.86	8.59309	9.55			0.13	3.02	12.4	3.372	0.609	0.41						99.386	3.91898	27.0194		182.154	35.403	19.6219	60.6212	99.3815		20.0918	7.70853	461.213	29.6419	162.686	21.0332			0.087348	124.906	17.0318	37.4652
SO100 26DS-2	Celsius	FSC >5 Ma	-124.107	-33.5283	2500	SO100	Stroncik & Devey (2011) and Devey (unpubl.)	XRF; ICPMS	WR	48.22	2.317	19.82	8.63808	9.6			0.13	2.93	12.38	3.362	0.617	0.432						99.808											15.6315	454.976	42.4185	244.55	33.9215			0.464072	174.701	25.8276	55.8195
SO100 25DS-1	Celsius	FSC >5 Ma	-123.875	-33.3461	1589	SO100	Stroncik & Devey (2011) and Devey (unpubl.); Maia et al. (2001)	XRF; ICPMS; TIMS	WR	59.17	0.985	17.12	7.43235	8.26			0.18	1.08	3.25	6.847	2.828	0.358						100.078	14.0398	7.97986		1.44723	6.1349	2.1067	10.2666	148.975		32.8755	28.613	284.842	55.4179	615.725	78.4245			0.0736498	649.875	59.4217	127.498
SO100 25DS-2	Celsius	FSC >5 Ma	-123.875	-33.3461	1589	SO100	Stroncik & Devey (2011) and Devey (unpubl.)	XRF	WR	59.74	0.891	17.8	7.17141	7.97			0.2	1.07	2.72	6.584	3.037	0.305						100.317
SO100 25DS-3	Celsius	FSC >5 Ma	-123.875	-33.3461	1589	SO100	Stroncik & Devey (2011) and Devey (unpubl.)	XRF	WR	59.35	0.975	17.3	7.44135	8.27			0.21	0.94	3.22	6.928	2.833	0.395						100.421
SO100 25DS-4	Celsius	FSC >5 Ma	-123.875	-33.3461	1589	SO100	Stroncik & Devey (2011) and Devey (unpubl.)	XRF	WR	58.64	1.028	17.52	7.62131	8.47			0.16	0.84	3.29	6.958	2.84	0.431						100.177
SO100 25DS-5	Celsius	FSC >5 Ma	-123.875	-33.3461	1589	SO100	Stroncik & Devey (2011) and Devey (unpubl.)	XRF	WR	58.33	1.003	17.03	7.45034	8.28			0.2	1.04	3.25	6.716	2.769	0.377						98.995
SO100 25DS-6	Celsius	FSC >5 Ma	-123.875	-33.3461	1589	SO100	Stroncik & Devey (2011) and Devey (unpubl.)	XRF	WR	59.76	1.032	17.51	7.71129	8.57			0.21	1.09	3.35	6.64	2.716	0.439						101.317
SO100 25DS8	Celsius	FSC >5 Ma	-123.875	-33.3461	1589	SO100	Hekinian et al., 1997	ICPMS	WR	58.4	0.96	17.1	7.42		6.3	1.24	0.17	0.8	3.05	6.9	2.94	0.39					1.18	100.13			62	0	3	17					28.5	275	53.5	615	81				575	60	122
SO100 33DS-1	Curie	FSC >5 Ma	-122.367	-34.1231	2104	SO100	Stroncik & Devey (2011) and Devey (unpubl.)	XRF; ICPMS; TIMS	WR	45.44	3.612	21.45	11.8414	13.16			0.17	1.59	7.22	4.283	1.906	0.738						99.569	15.3045	21.4323		83.3593	39.4913	50.7313	111.886	212.12		16.1317	22.6149	1190.31	39.4033	218.619	31.0627			0.149796	180.473	24.7008	50.1343
SO100 33DS-2	Curie	FSC >5 Ma	-122.367	-34.1231	2104	SO100	Stroncik & Devey (2011) and Devey (unpubl.)	XRF; ICPMS	WR	43.4	4.393	18.63	14.2528	15.84			0.2	2.7	8.44	3.82	1.094	1.222						99.739											7.42089	734.788	74.4916	269.322	43.6891			0.0679963	230.095	40.4846	63.9288
SO100 31DS-1	Curie	FSC >5 Ma	-122.24	-34.2432	2690	SO100	Haase (ME, unpubl.), Devey (TE, unpubl.)	EMP; ICPMS	Gl	49.9	3.53	14.57	12.83				0.2	4.13	8.95	3.05	1.04	0.6	0.048	0.177	0.065			99.1											13.1245	658.511	51.2253	420.43	61.9357			0.169582	321.743	44.4307	94.884
SO100 31DS-2	Curie	FSC >5 Ma	-122.24	-34.2432	2690	SO100	Stroncik & Devey (2011) and Devey (unpubl.)	XRF; ICPMS	WR	49.11	3.093	16.46	11.6884	12.99			0.2	2.63	7.46	4.695	1.571	0.97						99.179	15.4511	17.6674		1.18664	28.7325	12.2153	67.8898	198.162		24.9741	20.6005	539.53	56.8458	404.621	58.247			0.291027	335.186	44.7159	95.2419
SO100 38DS-1GLAS	Da Vinci	FSC >5 Ma	-121.979	-34.3186	3569	SO100	Stroncik & Devey (2011) and Devey (unpubl.)	XRF (ME: WR); ICPMS; TIMS	Gl/WR	47.25	2.637	21.88	8.03521	8.93			0.1	2.21	12.14	3.277	0.481	0.396						99.301											18.2756	551.172	39.0979	318.238	44.4382			0.203706	196.528	27.75	63.6304
SO100 38DS-2	Da Vinci	FSC >5 Ma	-121.979	-34.3186	3569	SO100	Stroncik & Devey (2011) and Devey (unpubl.)	XRF	WR	47.19	3.121	19.99	9.79882	10.89			0.14	2.9	11.41	3.246	0.609	0.453						99.949
SO100 41DS4	Darwin	FSC >5 Ma	-121.555	-34.8725	1888	SO100	Hekinian et al., 1997	ICPMS	WR	42.6	3.2	16.2	10.98		9.33	1.83	0.26	4.16	9.37	2.97	0.83	0.85					6.85	99.49			212	48	70	80					38.5	570	27	194	30				127	20.5	48
SO100 41DS-1	Darwin	FSC >5 Ma	-121.555	-34.8725	1888	SO100	Stroncik & Devey (2011) and Devey (unpubl.)	XRF; ICPMS	WR	47.8	2.952	20.32	8.29616	9.22			0.12	3.08	11.92	3.477	0.848	0.444						100.181	21.5519	18.9426		77.8535	34.2902	43.711	47.7591	123.16		20.4372	19.0575	749.264	24.1338	180.2	26.0427			1.54722	168.861	19.384	42.7753
SO100 41DS-2	Darwin	FSC >5 Ma	-121.555	-34.8725	1888	SO100	Stroncik & Devey (2011) and Devey (unpubl.)	XRF	WR	47.61	3.958	17.16	10.9866	12.21			0.36	3.9	10.36	3.592	1.076	0.663						100.889
SO100 41DS-3	Darwin	FSC >5 Ma	-121.555	-34.8725	1888	SO100	Stroncik & Devey (2011) and Devey (unpubl.)	XRF	WR	47.55	3.03	20.04	8.39513	9.33			0.11	3.06	11.56	3.52	0.817	0.492						99.509
SO100 45DS-1	Einstein	FSC >5 Ma	-120.72	-35.053	3812	SO100	Stroncik & Devey (2011) and Devey (unpubl.)	XRF; ICPMS	WR	46.25	3.591	17.84	12.1653	13.52			0.19	3.84	9.83	3.526	1.069	0.534						100.19	13.4059	22.7787		140.342	42.6065	37.1936	80.2947	186.151		20.3295	12.4282	597.849	45.7674	228.273	40.4803			0.218118	223.782	36.9464	64.4812
SO100 46DS3	Fermi	FSC >5 Ma	-120.408	-34.9556	3437	SO100	Hekinian et al., 1997	ICPMS	WR	45.6	2.75	17.7	10.31		8.76	1.72	0.15	4.47	10.56	3.05	0.46	0.58					3.39	100.16			232	160	34	70					4.6	498	35	200	30				118	25	49
SO100 46DS-1GLAS	Fermi	FSC >5 Ma	-120.408	-34.9556	3437	SO100	Stroncik & Devey (2011) and Devey (unpubl.)	XRF	Gl	46.64	3.064	17.89	11.3465	12.61			0.17	4.15	10.91	3.33	0.554	0.678						99.996
SO100 46DS-2GLAS	Fermi	FSC >5 Ma	-120.408	-34.9556	3437	SO100	Stroncik & Devey (2011) and Devey (unpubl.)	XRF (ME: WR); ICPMS; TIMS	Gl/WR	46.5	2.957	18.02	11.1575	12.4			0.17	4.55	10.84	3.241	0.595	0.587						99.86					42.2938	89.0531	67.2611	136.756		25.7423	16.8833	513.32	34.6302	262.682	36.021			0.221965	195.965	26.7603	59.2568
SO100 48DS-17	Galilei	FSC >5 Ma	-119.227	-34.953	1348	SO100	Stroncik & Devey (2011) and Devey (unpubl.)	XRF	WR	44.78	3.128	15.46	13.2721	14.75			0.24	2.93	9.6	4.285	1.267	2.895						99.335
SO100 48DS-3	Galilei	FSC >5 Ma	-119.227	-34.953	1348	SO100	Stroncik & Devey (2011) and Devey (unpubl.)	XRF; ICPMS; TIMS	WR	45.01	3.258	15.96	13.8659	15.41			0.28	3.87	9.29	3.613	0.839	2.053						99.583
SO100 48DS-6	Galilei	FSC >5 Ma	-119.227	-34.953	1348	SO100	Stroncik & Devey (2011) and Devey (unpubl.)	XRF; ICPMS	WR	62.71	0.512	16.43	7.08143	7.87			0.18	0.5	1.29	6.943	3.821	0.135						100.391	9.84631	3.15361		2.24277	2.25139	5.45734	16.506	168.656		40.3771	17.005	49.1549	83.5907	873.332	100.969			0.18115	885.461	66.9945	153.528
SO100 57DS-2	Hubble	FSC >5 Ma	-118.186	-35.3682	2641	SO100	Stroncik & Devey (2011) and Devey (unpubl.)	XRF; ICPMS	WR	59.22	0.68	17.21	7.77427	8.64			0.22	0.64	3.42	6.706	2.701	0.198						99.635	17.0067	7.90953		1.88697	2.36079	3.7408	35.3715	168.891		35.079	26.0782	298.636	67.0871	684.236	91.9615			0.0706488	577.178	65.9258	143.908
SO100 55DS-1	Hubble	FSC >5 Ma	-118.098	-35.3384	1596	SO100	Stroncik & Devey (2011) and Devey (unpubl.)	XRF; ICPMS	WR	41.23	4.08	17.16	15.3146	17.02			0.22	2.94	8.96	3.865	0.695	3.213						99.383	18.2287	27.4248		15.6413	29.8442	32.8992	64.2827	236.199		22.2972	4.8579	4208.52	81.3627	338.175	55.8012			0.0139054	301.192	53.8649	117.759
SO100 56DS-1	Hubble	FSC >5 Ma	-118.088	-35.3824	1538	SO100	Stroncik & Devey (2011) and Devey (unpubl.)	XRF; ICPMS; TIMS	WR	56.98	1.545	17.85	7.73828	8.6			0.18	1.66	4.45	6.231	2.31	0.489						100.295											27.8041	337.35	61.4021	601.385	74.2943			0.0750792	481.155	55.7145	116.387
SO100 56DS-3	Hubble	FSC >5 Ma	-118.088	-35.3824	1538	SO100	Stroncik & Devey (2011) and Devey (unpubl.)	XRF; ICPMS	WR	54.84	1.688	18.42	8.45812	9.4			0.21	1.86	5.1	5.977	1.92	0.891						100.306	18.2802	10.2112		11.9509	10.9676	17.0368	19.6968	138.344		26.7449	18.4868	1157.41	65.6996	622.919	74.4149			0.154551	483.553	57.4378	122.71
SO100 56DS-4	Hubble	FSC >5 Ma	-118.088	-35.3824	1538	SO100	Stroncik & Devey (2011) and Devey (unpubl.)	XRF	WR	53.61	1.782	18.59	8.68307	9.65			0.18	2.03	5.79	5.659	1.744	1.078						100.113
SO100 56DS-5	Hubble	FSC >5 Ma	-118.088	-35.3824	1538	SO100	Stroncik & Devey (2011) and Devey (unpubl.)	XRF	WR	51.44	1.94	18.76	9.37592	10.42			0.26	1.88	7.33	5.453	1.362	2.547						101.392
SO100 63DS-1	Humboldt	FSC >5 Ma	-117.438	-35.8	1657	SO100	Stroncik & Devey (2011) and Devey (unpubl.)	XRF; ICPMS	WR	49.54	2.699	16.22	12.8851	14.32			0.22	2.5	7.29	4.754	1.462	1.431						100.436											14.9259	498.381	78.6903	439.687	51.6242			0.0880819	299.3	50.2829	105.333
SO100 60DS-10	Jenner	FSC >5 Ma	-117.197	-35.45	2250	SO100	Stroncik & Devey (2011) and Devey (unpubl.)	XRF (ME: WR)	Gl/WR	48.02	1.903	19.64	8.58409	9.54			0.1	4	12.65	2.847	0.387	0.285						99.372
SO100 60DS-11GLAS	Jenner	FSC >5 Ma	-117.197	-35.45	2250	SO100	Stroncik & Devey (2011) and Devey (unpubl.)	XRF (ME: WR); ICPMS	Gl/WR	47.75	2.255	18.8	9.69984	10.78			0.11	3.76	11.77	3.053	0.513	0.336						99.127					49.759	39.5488	108.994	143.845		23.4683	14.8254	374.733	32.7815	204.609	25.7634			0.210107	174.136	23.3053	50.5727
SO100 60DS-12GLAS	Jenner	FSC >5 Ma	-117.197	-35.45	2250	SO100	Stroncik & Devey (2011) and Devey (unpubl.)	XRF (ME: WR); ICPMS	Gl/WR	47.57	1.763	21.19	7.93624	8.82			0.1	3.26	12.68	2.857	0.418	0.266						98.924					45.129	40.506	94.5577	126.094		20.4398	12.8777	325.212	28.5344	180.532	29.071			0.172427	149.087	20.1558	43.6466
SO100 60DS-1GLAS	Jenner	FSC >5 Ma	-117.197	-35.45	2250	SO100	Stroncik & Devey (2011) and Devey (unpubl.)	XRF (ME: WR); ICPMS; TIMS	Gl/WR	48.24	1.798	21.04	7.80127	8.67			0.1	3.48	12.78	2.91	0.373	0.278						99.669					46.4678	46.2565	89.2655	121.257		21.2512	12.5009	361.946	27.1752	169.874	26.7932			0.179497	142.651	18.701	40.6716
SO100 60DS-2GLAS	Jenner	FSC >5 Ma	-117.197	-35.45	2250	SO100	Stroncik & Devey (2011) and Devey (unpubl.)	XRF (ME: WR); ICPMS	Gl/WR	48	2.114	20.52	8.0892	8.99			0.12	3.65	12.64	3.007	0.404	0.385						99.83					42.0666	37.7012	84.3808	124.368		22.3826	15.2463	371.662	31.085	204.477	32.6979			0.216942	167.933	22.6526	49.0446
SO100 60DS-3GLAS	Jenner	FSC >5 Ma	-117.197	-35.45	2250	SO100	Stroncik & Devey (2011) and Devey (unpubl.)	XRF (ME: WR); ICPMS	Gl/WR	47.96	2.109	20.55	8.05321	8.95			0.12	3.64	12.58	2.967	0.403	0.362						99.641					44.4656	39.3778	95.4269	131.837		23.3382	16.2651	374.715	33.1311	223.751	35.1708			0.230411	182.398	24.5113	53.202
SO100 60DS-4GLAS	Jenner	FSC >5 Ma	-117.197	-35.45	2250	SO100	Stroncik & Devey (2011) and Devey (unpubl.)	XRF (ME: WR)	Gl/WR	48.66	2.681	18.05	9.69984	10.78			0.14	4.28	11.6	3.331	0.648	0.473						100.643
SO100 60DS-5GLAS	Jenner	FSC >5 Ma	-117.197	-35.45	2250	SO100	Stroncik & Devey (2011) and Devey (unpubl.)	XRF (ME: WR); ICPMS	Gl/WR	49.01	2.263	19.05	8.72806	9.7			0.12	4.05	11.92	3.272	0.597	0.355						100.337					43.4125	42.3777	87.2278	129.219		22.9305	15.9983	378.943	32.2448	213.358	33.8978			0.258716	173.065	23.3433	50.4758
SO100 60DS-7AGLAS	Jenner	FSC >5 Ma	-117.197	-35.45	2250	SO100	Stroncik & Devey (2011) and Devey (unpubl.)	XRF (ME: WR); ICPMS	Gl/WR	48.02	2.821	16.31	10.2847	11.43			0.13	4.68	11.13	3.422	0.696	0.45						99.089					47.9178	37.2638	49.6945	154.172		25.6565	17.8197	405.978	37.6448	253.436	40.63			0.233972	204.473	28.3673	61.5688
SO100 60DS-7BGLAS	Jenner	FSC >5 Ma	-117.197	-35.45	2250	SO100	Stroncik & Devey (2011) and Devey (unpubl.)	XRF (ME: WR)	Gl/WR	48.2	3.086	16.05	11.3285	12.59			0.18	4.64	10.87	3.364	0.73	0.487						100.197
SO100 60DS-8GLAS	Jenner	FSC >5 Ma	-117.197	-35.45	2250	SO100	Stroncik & Devey (2011) and Devey (unpubl.)	XRF (ME: WR); ICPMS	Gl/WR	47.66	1.773	22.14	7.78327	8.65			0.1	2.96	12.7	2.902	0.45	0.277						99.612					52.2006	42.8204	108.805	145.767		23.8344	15.1628	378.021	33.2214	209.764	33.9514			0.225112	172.559	23.1655	50.4516
SO100 60DS-9GLAS	Jenner	FSC >5 Ma	-117.197	-35.45	2250	SO100	Stroncik & Devey (2011) and Devey (unpubl.)	XRF (ME: WR); ICPMS	Gl/WR	47.91	1.746	21.24	7.72028	8.58			0.1	3.59	13.1	2.777	0.357	0.259						99.659					48.4998	46.7941	90.4223	123.879		21.3437	12.5467	359.862	28.1272	175.086	27.5763			0.167201	151.537	19.5711	42.661
SO100 58DS2	Kelvin	FSC >5 Ma	-116.821	-35.5072	1604	SO100	Hekinian et al., 1997	ICPMS	WR	55	1.82	17	7.26		6.17	1.21	0.15	1.53	5.69	6.14	2.26	0.63					1.08	99.36			53	2	8	5					26.5	370	60	430	76				432	53	108
SO100 58DS4	Kelvin	FSC >5 Ma	-116.821	-35.5072	1604	SO100	Hekinian et al., 1997	EMP	Gl	48.3	2.31	14.71	10.61				0.18	6.42	10.75	3.25	0.53	0.29						97.34
SO100 58DS-1	Kelvin	FSC >5 Ma	-116.821	-35.5072	1604	SO100	Stroncik & Devey (2011) and Devey (unpubl.)	XRF; ICPMS	WR	48.16	2.888	15.94	10.9956	12.22			0.22	3.95	11.06	3.708	0.758	0.541						99.445	6.08275	31.8974		153.126	45.1631	24.0023	50.4208	142.804		21.5968	8.48581	391.263	35.1719	193.768	28.9526			0.0608392	181.018	21.7751	47.1432
SO100 58DS-5	Kelvin	FSC >5 Ma	-116.821	-35.5072	1604	SO100	Stroncik & Devey (2011) and Devey (unpubl.)	XRF	WR	48.78	3.086	17.42	10.4827	11.65			0.16	3.16	10.26	3.922	0.926	0.551						99.915
SO100 58DS-8	Kelvin	FSC >5 Ma	-116.821	-35.5072	1604	SO100	Stroncik & Devey (2011) and Devey (unpubl.)	XRF	WR	55.96	1.915	17.45	8.34115	9.27			0.19	1.5	5.91	6	2.161	0.712						101.068
SO100 59DS-1	Kepler	FSC >5 Ma	-116.647	-35.4455	2444	SO100	Haase (ME, unpubl.), Devey (TE, unpubl.)	EMP; ICPMS	Gl	49.88	3.48	14.79	12.55				0.2	4.27	8.85	2.9	1.04	0.6	0.025	0.092	0.055			98.72											14.4628	405.967	41.24	366.366	41.8056			0.726198	192.47	29.2342	62.4819
SO100 59DS-3	Kepler	FSC >5 Ma	-116.647	-35.4455	2444	SO100	Stroncik & Devey (2011) and Devey (unpubl.)	XRF; ICPMS	WR	46.35	3.345	16.6	13.362	14.85			0.23	3.65	9.54	3.901	0.854	0.568						99.888	15.216	29.1093		57.0266	43.0372	23.8505	73.1943	209.376		20.1503	9.11999	411.228	51.0845	256.659	37.4292			0.0665024	208.079	30.6732	62.6005
SO100 67DS-5	Kopernik	FSC >5 Ma	-115.988	-36.033	1718	SO100	Stroncik & Devey (2011) and Devey (unpubl.)	XRF; ICPMS	WR	43.41	3.609	17.63	14.3788	15.98			0.24	4.9	9.35	3.611	0.561	1.128						100.419											5.19461	1717.92	63.0177	196.044	34.9055			0.0194937	167.186	33.5374	51.6726
SO100 66DS-1	Lavoisier	FSC >5 Ma	-115.652	-35.7912	1559	SO100	Stroncik & Devey (2011) and Devey (unpubl.)	XRF; ICPMS; TIMS	WR	45.16	2.902	18.55	11.0405	12.27			0.17	4.31	9.6	3.621	1.037	1.473						99.093											6.81628	2031.91	37.2011	285.531	61.6509			0.0549635	266.244	34.5976	66.6818
SO100 69DS-1	Linné	FSC >5 Ma	-115.273	-36.5608	3126	SO100	Haase (ME, unpubl.), Devey (TE, unpubl.)	EMP; ICPMS; TIMS	Gl	48.94	2.91	15.02	10.99				0.15	5.33	10.55	3.52	0.75	0.55	0.041	0.249	0.034			99.04											7.11374	477.729	31.7959	231.323	28.5122			0.137906	133.381	19.5027	43.7641
FH13-01	Mendel	FSC <5 Ma	-114.378	-36.28		Hotline (Atalante)	Maia et al., 2001	EMP	Gl	50.01	3.49	13.39	14.44				0.24	4.38	8.83	2.76	0.65	0.51						98.82
FH15-03	Linné Ridge	FSC <5 Ma	-114.367	-35.7497	2405	Hotline (Atalante)	Hekinian et al., 1999	EMP	Gl	49.74	3.28	13.71	13.01				0.2	4.78	9.16	3.16	0.76	0.51						98.32
FH15-04	Linné Ridge	FSC <5 Ma	-114.367	-35.7497	2405	Hotline (Atalante)	Hekinian et al., 1999; Maia et al., 2001	EMP; ICPMS; TIMS	Gl	48.87	2.36	13.99	11.21				0.18	5.84	11	3.23	0.59	0.31						97.58		42.67		21.61	48.05	23.11	50.63	127.12			14.16	380.01	33.1	223.15	35.58				145.34	25.62	54.96
FH15-06	Linné Ridge	FSC <5 Ma	-114.367	-35.7497	2405	Hotline (Atalante)	Hekinian et al., 1999	EMP	Gl	48.66	2.35	13.84	11.38				0.2	5.92	10.95	3.22	0.56	0.35						97.43
FH15-10	Linné Ridge	FSC <5 Ma	-114.367	-35.7497	2405	Hotline (Atalante)	Hekinian et al., 1999; Maia et al., 2001	ICPMS; TIMS	Gl																					41		21.14	53.5	30.44	48.97	129.46			13.36	370.81	33.19	219.41	34.83				143.88	25.17	53.3
FH15-15	Linné Ridge	FSC <5 Ma	-114.367	-35.7497	2405	Hotline (Atalante)	Hekinian et al., 1999	EMP	Gl	49.35	2.76	13.78	11.71				0.16	5.7	10.23	3.44	0.64	0.36						98.14
SO100 70DS-2GLAS	Mendel	FSC <5 Ma	-113.928	-36.3484	2248	SO100	Stroncik & Devey (2011) and Devey (unpubl.)	XRF (ME: WR)	Gl/WR	48.26	2.457	15.57	12.3273	13.7			0.22	5.45	11.32	2.861	0.554	0.389						100.781											12.2755	333.801	34.1082	205.872	29.257			0.132387	136.996	19.9518	43.43
SO100 70DS1	Mendel	FSC <5 Ma	-113.928	-36.3484	2248	SO100	Haase (unpubl.)	EMP; ICPMS; TIMS	Gl	49.21	2.54	14.49	12.16				0.15	5.92	10.8	2.94	0.53	0.41	0.042	0.232	0.035			99.46	6.44	35.7	309	79.2	47.8	58.7	90.727	78.4	1.479	20	10.3	280	35.1	194	25.829	1.874	0.118	0.174	130.056	19.876	45.199
SO100 71DS-1GLAS	Mercator	FSC <5 Ma	-113.472	-36.6802	2751	SO100	Haase (ME, Iso., unpubl.), Devey (TE, unpubl.)	EMP; ICPMS; TIMS	Gl	50.32	2.22	14.46	12.28				0.17	5.67	10.53	3.2	0.36	0.35	0.032	0.276	0.027			99.89					57.1581	164.224	82.393	89.8479		16.5034	1.00788	146.657	23.564	39.8687	1.41939			0.0313546	10.3692	2.0589	5.74401
SO100 71DS-2	Mercator	FSC <5 Ma	-113.472	-36.6802	2751	SO100	Stroncik & Devey (2011) and Devey (unpubl.)	XRF	WR	49.85	2.235	14.63	12.6242	14.03			0.22	5.22	10.83	3.136	0.661	0.324						101.136
SO100 73DS-1	Mercator	FSC <5 Ma	-113.374	-36.7218	400	SO100	Stroncik & Devey (2011) and Devey (unpubl.)	XRF; ICPMS	WR	46.95	2.261	16.06	12.3453	13.72			0.21	5.07	11.54	3.122	0.306	0.516						99.755	14.0014	18.0936		0.741622	22.6432	7.35735	30.1573	218.528		28.8023	14.5163	439.597	82.0008	481.843	56.8303			0.0866901	316.676	51.0926	112.399
SO100 73DS-2	Mercator	FSC <5 Ma	-113.374	-36.7218	400	SO100	Stroncik & Devey (2011) and Devey (unpubl.)	XRF	WR	46.45	2.343	17.08	12.8042	14.23			0.27	4.59	10.99	3.407	0.342	0.613						100.315
SO100 73DS-3	Mercator	FSC <5 Ma	-113.374	-36.7218	400	SO100	Stroncik & Devey (2011) and Devey (unpubl.)	XRF	WR	47.11	2.244	16.91	12.0663	13.41			0.22	4.79	11.49	3.33	0.312	0.483						100.299
SO100 73DS-4	Mercator	FSC <5 Ma	-113.374	-36.7218	400	SO100	Stroncik & Devey (2011) and Devey (unpubl.)	XRF; ICPMS	WR	46.38	2.492	15.33	13.587	15.1			0.32	5.2	11.31	3.187	0.254	0.632						100.205											2.48665	343.54	42.3257	156.708	19.4014			0.0766772	69.2331	15.9508	34.7776
FH11-01	Newton	FSC <5 Ma	-113.076	-36.9247	2600	Hotline (Atalante)	Hekinian et al., 1999; Maia et al., 2001	ICPMS; TIMS	Gl																					49.2		269.1	61.27	181.73	93.89	85.35			1.23	228.86	30.6	122.31	5.25				16.43	6.08	15.71
FH11-03	Newton	FSC <5 Ma	-113.076	-36.9247	2600	Hotline (Atalante)	Hekinian et al., 1999; Maia et al., 2001	ICPMS; TIMS	Gl																					49.22		551.2	69.54	285.17	101.66	79.37			0.8	215.62	26.08	95.09	2.58				8.43	3.71	10.66
FH11-10	Newton	FSC <5 Ma	-113.076	-36.9247	2600	Hotline (Atalante)	Hekinian et al., 1999	EMP	Gl	47	1.5	16.44	10.2				0.16	8.38	11.15	2.85	0.18	0.17						98.07
FH11-16	Newton	FSC <5 Ma	-113.076	-36.9247	2600	Hotline (Atalante)	Hekinian et al., 1999	EMP	Gl	47.05	1.54	16.8	10.06				0.1	8.16	11.17	2.89	0.22	0.18						98.27
SO100 74DS-1GLAS	Ohm	FSC <5 Ma	-112.215	-36.9498	1917	SO100	Haase (ME, unpubl.), Devey (TE, Iso., unpubl.)	EMP; ICPMS; TIMS	Gl	47.24	0.82	17.98	11.69				0.19	8.47	11.39	2.59	0.04	0.15	0.032	0.254	0.004			100.87					49.6749	32.0228	70.5345	123.383		21.1199	6.19582	274.367	33.6593	152.641	16.2417			0.0799265	82.6276	12.8358	30.6097
SO100 74DS2	Ohm	FSC <5 Ma	-112.215	-36.9498	1917	SO100	Hekinian et al., 1997	ICPMS	WR	45.3	0.74	16.73	12.14		10.32	2.02	0.22	10.3	10.25	2.47	0.07	0.13					0.53	100.23			236	316	59	295					1.1	133	22.5	32	1.4				11	1.8	3.7
SO100 74DS3	Ohm	FSC <5 Ma	-112.215	-36.9498	1917	SO100	Hekinian et al., 1997	EMP	Gl	46.26	0.79	17.09	11.44				0.18	9.09	11.02	2.56	0.03	0.04						98.58
SO100 74DS6	Ohm	FSC <5 Ma	-112.215	-36.9498	1917	SO100	Hekinian et al., 1997	ICPMS	WR	46	0.74	16.6	11.88		10.1	1.98	0.21	10.8	10.48	2.38	0.09	0.1					-0.28	100.32			220	312	62	310					1.5	127	21.5	32	1.4				6.5	1.9	5
SO100 100DS-1GLAS	Pasteur	FSC <5 Ma	-112.124	-37.2837	2529	SO100	Haase (ME, unpubl.), Devey (TE, unpubl.); Maia et al., 2001 (Pb-Iso.)	EMP; ICPMS; TIMS	Gl	50.5	1.84	14.68	10.99				0.19	6.68	11.46	2.83	0.18	0.27	0.052	0.118	0.016			99.81					51.2385	80.9239	110.957	98.2291		17.5779	3.75892	194.844	27.2855	101.973	9.96439			0.066424	44.0006	7.56021	17.8875
SO100 76DS-1	Pascal	FSC <5 Ma	-112.102	-37.3698	1621	SO100	Haase (ME, unpubl.), Devey (TE, unpubl.)	EMP; ICPMS	Gl	51.34	1.98	14.89	10.45				0.18	6.59	12.06	2.26	0.36	0.35	0.021	0.254	0.021			100.75	3.16549	36.8945		98.6867	44.1277	36.4014	75.2558	98.3416		16.9146	10.2571	270.407	29.7319	135.371	14.4012			0.364411	61.0165	11.8084	27.8029
SO100 76DS-3	Pascal	FSC <5 Ma	-112.102	-37.3698	1621	SO100	Stroncik & Devey (2011) and Devey (unpubl.)	XRF; ICPMS	Gl	49.6	1.906	14.65	10.2577	11.4			0.17	6.29	12.03	2.812	0.565	0.256						99.679											9.45801	310.119	28.0477	145.992	15.3481			0.266836	62.2599	11.4442	27.2275
SO100 76DS-4	Pascal	FSC <5 Ma	-112.102	-37.3698	1621	SO100	Stroncik & Devey (2011) and Devey (unpubl.)	XRF; ICPMS; TIMS	Gl	50.59	1.951	15.13	10.0238	11.14			0.17	6.19	12.38	2.759	0.568	0.278						101.156
SO100 76DS-5	Pascal	FSC <5 Ma	-112.102	-37.3698	1621	SO100	Stroncik & Devey (2011) and Devey (unpubl.)	XRF	WR	49.32	1.911	14.43	10.2937	11.44			0.17	6.25	12.12	2.813	0.575	0.242						99.271
SO100 76DS2	Pascal	FSC <5 Ma	-112.102	-37.3698	1621	SO100	Stroncik & Devey (2011) and Devey (unpubl.)	EMP	Gl	48.87	3.34	15.41	11.08				0.16	5.1	9.67	3.68	0.94	0.68	0.032	0.216	0.062			99.24
SO100 101GTV-2	Pascal	FSC <5 Ma	-112.099	-37.3858	1042	SO100	Stroncik & Devey (2011) and Devey (unpubl.)	XRF	WR	48.63	2.162	15.56	11.9223	13.25			0.18	5.7	11.65	2.987	0.198	0.341						100.658
SO100 97DS-1	Pascal	FSC <5 Ma	-112.057	-37.4169	2093	SO100	Stroncik & Devey (2011) and Devey (unpubl.)	XRF; ICPMS	Gl	46.95	1.087	16.37	9.69984	10.78			0.16	10.23	11.49	2.527	0.143	0.147						99.884					57.9009	229.397	104.622	87.3444		17.6236	1.22044	210.973	25.0028	80.3081	3.09539			0.0266878	12.7608	3.37966	9.60264
SO100 97DS-2GLAS	Pascal	FSC <5 Ma	-112.057	-37.4169	2093	SO100	Haase (ME, unpubl.), Devey (TE, unpubl.); Maia et al., 2001 (Pb-Iso.)	EMP; ICPMS; TIMS	Gl	48.16	1.18	17.52	9.72				0.14	8.53	11.93	2.64	0.09	0.19	0.054	0.202	0.006			100.36					54.4268	188.941	89.0688	78.8938		15.9883	0.95557	197.193	22.9664	73.0275	2.71655			0.0151783	12.4374	3.24107	9.40812
SO100 97DS-3	Pascal	FSC <5 Ma	-112.057	-37.4169	2093	SO100	Stroncik & Devey (2011) and Devey (unpubl.)	XRF	Gl	45.94	0.909	16.1	12.2193	13.58			0.19	9.75	10.71	2.594	0.032	0.062						99.867
SO100 97DS-4GLAS	Pascal	FSC <5 Ma	-112.057	-37.4169	2093	SO100	Stroncik & Devey (2011) and Devey (unpubl.)	XRF (ME: WR); ICPMS	Gl/WR	47.46	1.097	16.46	9.79882	10.89			0.16	10.13	11.42	2.518	0.185	0.127						100.447					57.4925	216.175	97.9866	83.2588		17.1514	1.02477	208.498	24.8616	78.8616	2.91394			0.0192658	11.3555	3.38064	9.7605
SO100 99DS-1GLAS	Pasteur	FSC <5 Ma	-112.051	-37.2628	2099	SO100	Haase (ME, unpubl.), Devey (TE, unpubl.); Maia et al., 2001 (Pb-Iso.)	EMP; ICPMS; TIMS	Gl	50.69	1.67	14.82	10.2				0.17	6.95	11.87	2.71	0.21	0.28	0.025	0.139	0.018			99.76					50.078	47.1316	90.8178	93.476		17.2594	3.37873	208.485	27.238	125.455	10.7526			0.0393834	44.3307	8.66566	21.3711
SO100 99DS-3GLAS	Pasteur	FSC <5 Ma	-112.051	-37.2628	2099	SO100	Stroncik & Devey (2011) and Devey (unpubl.)	ICPMS; TIMS	Gl																								52.6466	54.7039	104.423	104.811		19.3989	3.99254	228.001	30.3402	127.759	11.7328			0.0662275	48.7417	9.25693	22.7261
SO100 99DS-7	Pasteur	FSC <5 Ma	-112.051	-37.2628	2099	SO100	Stroncik & Devey (2011) and Devey (unpubl.)	XRF	WR	50.01	1.633	14.49	10.1587	11.29			0.18	6.99	12.16	2.784	0.321	0.197						100.055
SO100 99DS5	Pasteur	FSC <5 Ma	-112.051	-37.2628	2099	SO100	Haase (unpubl.)	EMP	Gl	50.2	2.02	14.4	11.44				0.19	6.05	10.82	3.04	0.28	0.33	0.025	0.161	0.012			98.97
SO100 98DS-2GLAS	Pascal	FSC <5 Ma	-112.008	-37.3632	2963	SO100	Stroncik & Devey (2011) and Devey (unpubl.); Maia et al. (2001)	XRF (ME: WR); ICPMS; TIMS	Gl/WR	47.21	1.119	16.29	9.77183	10.86			0.16	10.97	11.15	2.517	0.196	0.131						100.603					53.9935	176.273	95.0777	83.3878		17.6068	1.30977	238.647	23.7709	88.672	3.32754			0.0240827	12.423	4.04034	11.3946
SO100 98DS-3GLAS	Pascal	FSC <5 Ma	-112.008	-37.3632	2963	SO100	Stroncik & Devey (2011) and Devey (unpubl.)	XRF (ME: WR); ICPMS	Gl/WR	47.41	1.316	16.36	11.0855	12.32			0.18	8.78	11.65	2.631	0.208	0.17						101.025					54.2696	159.127	82.8445	90.8022		17.4075	0.924646	180.873	28.0568	83.4235	2.98964			0.0141269	10.4228	3.78773	10.8608
SO100 98DS-4	Pascal	FSC <5 Ma	-112.008	-37.3632	2963	SO100	Stroncik & Devey (2011) and Devey (unpubl.)	XRF	WR	47.18	1.151	16.64	9.72684	10.81			0.16	9.87	11.53	2.744	0.192	0.138						100.415
SO100 98DS1	Pascal	FSC <5 Ma	-112.008	-37.3632	2963	SO100	Haase (unpubl.)	EMP	Gl	48.28	1.27	17.51	9.76				0.14	8.14	11.92	2.74	0.12	0.22	0.049	0.21	0.006			100.37
SO100 75DS-2	Schrödinger	FSC <5 Ma	-111.859	-37.278	2381	SO100	Stroncik & Devey (2011) and Devey (unpubl.); Maia et al. (2001)	XRF; ICPMS; TIMS	WR	49.3	1.349	15.08	8.52111	9.47			0.15	7.52	13.3	2.391	0.324	0.148						99.032	1.43254	40.9572		356.861	48.1616	66.862	101.803	79.6623		15.1299	5.85159	196.699	24.7808	90.9736	8.73627			0.183908	42.5502	7.11599	17.2284
SO100 75DS-4	Schrödinger	FSC <5 Ma	-111.859	-37.278	2381	SO100	Stroncik & Devey (2011) and Devey (unpubl.)	XRF	WR	49.86	1.357	15.6	8.77305	9.75			0.15	7.36	13.21	2.455	0.342	0.154						100.238
SO100 75DS-6	Schrödinger	FSC <5 Ma	-111.859	-37.278	2381	SO100	Stroncik & Devey (2011) and Devey (unpubl.)	XRF	WR	50.22	1.342	15.8	7.97223	8.86			0.15	7.67	13.62	2.48	0.242	0.142						100.526
SO100 75DS1	Schrödinger	FSC <5 Ma	-111.859	-37.278	2381	SO100	Hekinian et al., 1997	ICPMS	WR	49.3	1.3	15.45	8.82		7.5	1.47	0.22	6.93	12.8	2.51	0.39	0.14					1.14	99.98			264	320	40	81					6.6	190	23	80	8.4				46	7	16
SO100 78DS-1	Watt	FSC <5 Ma	-111.758	-37.3635	2296	SO100	Stroncik & Devey (2011) and Devey (unpubl.); Maia et al. (2001)	XRF; ICPMS; TIMS	WR	49.82	1.265	15.69	9.35792	10.4			0.16	7.3	13.03	2.292	0.454	0.152						100.563	2.37792	38.4751		349.324	45.4609	78.1457	88.9908	80.4378		14.6092	9.34224	177.074	23.7847	81.9458	10.277			0.372274	41.8013	8.19587	18.6135
SO100 78DS-2	Watt	FSC <5 Ma	-111.758	-37.3635	2296	SO100	Haase (ME, unpubl.); Hekinian et al., 1997	EMP	Gl	49.85	1.3	15.59	9.38				0.16	7.8	12.69	2.32	0.16	0.21	0.078	0.134	0.018			99.7			265	383	47	95					6.6	170	22	72	10.4				42	8	17.5
SO100 78DS-4	Watt	FSC <5 Ma	-111.758	-37.3635	2296	SO100	Stroncik & Devey (2011) and Devey (unpubl.)	XRF	Gl	49.36	1.284	15.37	9.38491	10.43			0.17	7.46	13.22	2.293	0.389	0.166						100.142
SO100 89DS-1	South Ridge	FSC <5 Ma	-111.678	-37.5231	1909	SO100	Stroncik & Devey (2011) and Devey (unpubl.)	XRF; ICPMS	Gl	48.25	1.304	15.71	8.98	9.98			0.15	8.49	12.34	2.301	0.218	0.181						98.924											2.08116	216.766	18.548	82.6592	7.11905			0.034385	26.3759	5.58058	13.7211
SO100 89DS-2	South Ridge	FSC <5 Ma	-111.678	-37.5231	1909	SO100	Stroncik & Devey (2011) and Devey (unpubl.)	XRF	WR	49.57	1.408	16.18	8.92602	9.92			0.12	4.75	13.31	2.758	0.333	0.15						98.499
SO100 89DS-3GLAS	South Ridge	FSC <5 Ma	-111.678	-37.5231	1909	SO100	Stroncik & Devey (2011) and Devey (unpubl.); Maia et al. (2001)	XRF; ICPMS; TIMS	Gl	48.48	1.304	15.9	9.05199	10.06			0.16	8.61	12.35	2.296	0.18	0.167						99.507					51.643	101.636	92.5476	85.8273		17.0909	2.54239	232.861	22.2852	93.9547	8.10541			0.0396702	31.1329	6.59804	16.2625
SO100 89DS-4	South Ridge	FSC <5 Ma	-111.678	-37.5231	1909	SO100	Stroncik & Devey (2011) and Devey (unpubl.)	XRF	Gl	48.42	1.3	15.92	8.998	10			0.16	8.64	12.33	2.38	0.196	0.217						99.563
SO100 89DS-6	South Ridge	FSC <5 Ma	-111.678	-37.5231	1909	SO100	Stroncik & Devey (2011) and Devey (unpubl.)	XRF	WR	51.08	1.752	15.98	9.34892	10.39			0.19	5.38	12.8	3.046	0.264	0.231						101.113
SO100 77DS-1	Pauling	FSC <5 Ma	-111.66	-37.0571	2295	SO100	Stroncik & Devey (2011) and Devey (unpubl.); Maia et al. (2001)	XRF; ICPMS; TIMS	WR	50.63	1.586	14.37	10.3297	11.48			0.18	6.38	12.26	2.869	0.498	0.171						100.424	2.39994	42.9214		156.693	45.6301	38.3741	78.5864	94.1741		16.3678	10.7513	209.17	30.2758	106.012	6.4061			0.456003	37.3897	6.4401	16.8048
SO100 77DS-2	Pauling	FSC <5 Ma	-111.66	-37.0571	2295	SO100	Stroncik & Devey (2011) and Devey (unpubl.)	XRF	WR	50.45	1.563	14.9	8.92602	9.92			0.17	6.48	12.44	3.005	0.327	0.159						99.414
SO100 77DS-3	Pauling	FSC <5 Ma	-111.66	-37.0571	2295	SO100	Stroncik & Devey (2011) and Devey (unpubl.)	XRF	WR	49.71	1.499	14.5	9.63686	10.71			0.18	6.48	12.58	2.844	0.395	0.159						99.057
SO100 79DS-1	North Ridge	FSC <5 Ma	-111.435	-37.4185	2565	SO100	Stroncik & Devey (2011) and Devey (unpubl.)	XRF	WR	46.63	1.214	16.35	9.51988	10.58			0.16	10.91	10.77	2.728	0.113	0.185						99.64
SO100 79DS-3	North Ridge	FSC <5 Ma	-111.435	-37.4185	2565	SO100	Stroncik & Devey (2011) and Devey (unpubl.)	XRF	WR	46.6	1.218	16.34	9.65485	10.73			0.16	11.13	10.77	2.824	0.101	0.146						100.019
SO100 79DS-4GLAS	North Ridge	FSC <5 Ma	-111.435	-37.4185	2565	SO100	Stroncik & Devey (2011) and Devey (unpubl.)	XRF; ICPMS; TIMS	Gl																				2.74066	29.8844		389.243	61.4621	239.425	82.8792	75.1083		14.6405	0.306705	187.031	23.4219	91.2564	1.64616			0.000782084	6.01863	3.30866	10.6509
SO100 79DS2	North Ridge	FSC <5 Ma	-111.435	-37.4185	2565	SO100	Haase (unpubl.)	EMP	Gl	47.89	1.3	18.19	9.14				0.15	8.36	11.5	2.87	0.05	0.21	0.085	0.207	0.008			99.96
SO100 79DS6	North Ridge	FSC <5 Ma	-111.435	-37.4185	2565	SO100	Hekinian et al., 1997	ICPMS	WR	46.75	1.19	16.55	9.43		8.02	1.57	0.16	11.05	10.75	2.81	0.12	0.13					0.09	100.08			197	361	53	298					1.8	191	25	85	2.2				6	3.3	10.5
SO100 83DS-1GLAS	North Ridge	FSC <5 Ma	-111.405	-37.4104	1635	SO100	Stroncik & Devey (2011) and Devey (unpubl.); Maia et al. (2001)	XRF; ICPMS; TIMS	Gl	49.44	1.435	15.32	9.95179	11.06			0.18	7.49	12.36	2.568	0.176	0.214						100.243	3.03216	38.0339		194.939	53.1781	63.201	93.9635	85.7483		15.8841	2.1727	180.152	26.9452	95.2398	7.14729			0.0239356	31.7571	6.4094	16.2971
SO100 83DS-2GLAS	North Ridge	FSC <5 Ma	-111.405	-37.4104	1635	SO100	Stroncik & Devey (2011) and Devey (unpubl.)	XRF; ICPMS	Gl	48.97	1.556	15.56	11.1575	12.4			0.28	7.26	11.85	2.563	0.277	0.227						100.943	2.91115	36.6378		193.129	51.9981	62.5364	91.5823	83.4288		15.3362	2.04875	177.915	26.5543	94.5953	7.05388			0.0201885	31.8307	6.36078	16.0497
SO100 88DS-1	South Ridge	FSC <5 Ma	-111.35	-37.6341	1909	SO100	Haase (ME, unpubl.), Devey (TE, unpubl.); Maia et al., 2001 (Pb-Iso.)	EMP; ICPMS; TIMS	Gl	50.29	1.82	15.1	9.57				0.17	7.1	12.15	2.76	0.25	0.3	0.053	0.206	0.015			99.78					46.3846	82.1767	86.3585	93.7369		18.8153	3.14691	254.202	28.5403	130.938	9.54924			0.0472161	33.1849	8.39602	21.2443
SO100 87DS-1GLAS	South Ridge	FSC <5 Ma	-111.29	-37.649	1738	SO100	Haase (ME, unpubl.), Devey (TE, Iso., unpubl.)	EMP; ICPMS; TIMS	Gl	50.26	2.22	14.57	11.98				0.15	5.96	10.79	3.03	0.34	0.33	0.037	0.287	0.025			99.97											4.84544	263.35	34.2569	157.922	13.6267			0.0565745	53.103	10.443	26.3189
SO100 87DS-2GLAS	South Ridge	FSC <5 Ma	-111.29	-37.649	1738	SO100	Stroncik & Devey (2011) and Devey (unpubl.); Maia et al. (2001)	XRF; ICPMS; TIMS	Gl	49.85	2.232	14.25	11.5984	12.89			0.19	5.67	10.93	3.068	0.525	0.252						99.857					47.5819	34.0121	64.7619	116.538		19.7549	4.29778	234.261	32.7158	150.838	13.0497			0.0551518	50.2223	10.9924	27.1454
SO100 87DS3	South Ridge	FSC <5 Ma	-111.29	-37.649	1738	SO100	Haase (unpubl.)	EMP	Gl	50.53	2.27	14.45	11.73				0.18	6.08	10.71	3.04	0.34	0.36	0.035	0.15	0.027			99.9
SO100 82DS-2GLAS	North Ridge	FSC <5 Ma	-111.211	-37.4588	1844	SO100	Stroncik & Devey (2011) and Devey (unpubl.)	XRF; ICPMS; TIMS	Gl	49.16	1.387	15.68	9.13297	10.15			0.16	8.04	12.43	2.656	0.245	0.151						100.059	3.08307	35.7175		309.903	52.1992	92.1577	89.3306	81.6022		15.4209	1.29767	168.756	26.2495	87.5397	4.37177			0.0112982	18.5217	4.60418	12.5386
SO100 82DS1	North Ridge	FSC <5 Ma	-111.211	-37.4588	1844	SO100	Haase (ME, unpubl.); Maia et al., 2001 (Pb-Iso.)	EMP; ICPMS; TIMS	Gl	50.17	1.5	15.53	9.48				0.15	7.71	12.52	2.73	0.14	0.25	0.047	0.21	0.01			100.46
SO100 81GTV-1GLAS	North Ridge	FSC <5 Ma	-111.198	-37.4294	1465	SO100	Stroncik & Devey (2011) and Devey (unpubl.); Maia et al. (2001)	XRF; ICPMS; TIMS	Gl	49.78	1.287	15.61	8.82704	9.81			0.16	8.4	12.52	2.495	0.139	0.153						100.354	2.76501	34.2119		336.103	49.3716	94.381	79.8595	74.8303		14.6919	1.47274	171.263	23.6727	81.1748	4.76704			0.0172612	21.3178	4.83132	12.5545
SO100 81GTV-2	North Ridge	FSC <5 Ma	-111.198	-37.4294	1465	SO100	Stroncik & Devey (2011) and Devey (unpubl.)	XRF	Gl	49.29	1.28	15.55	8.84503	9.83			0.16	8.41	12.46	2.422	0.147	0.162						99.711
SO100 81GTV-3GLAS	North Ridge	FSC <5 Ma	-111.198	-37.4294	1465	SO100	Stroncik & Devey (2011) and Devey (unpubl.)	XRF; ICPMS	Gl	49.76	1.285	15.64	8.77305	9.75			0.16	8.34	12.43	2.45	0.155	0.149						100.119	2.86508	34.5278		340.388	49.7958	97.9869	82.555	76.9917		14.9812	1.46435	174.25	24.2928	82.0025	4.78846			0.0193357	21.2847	4.83556	12.6592
SO100 81GTV-4GLAS	North Ridge	FSC <5 Ma	-111.198	-37.4294	1465	SO100	Stroncik & Devey (2011) and Devey (unpubl.)	XRF; ICPMS	Gl	49.53	1.288	15.61	8.87203	9.86			0.16	8.42	12.56	2.461	0.135	0.155						100.179	2.85492	35.2219		342.784	53.2037	102.448	82.8624	75.6301		15.1496	1.43923	173.898	24.0753	81.2785	4.70108			0.0158549	20.8247	4.75792	12.4684
SO157 12DS1	South Ridge	FSC <5 Ma	-111.067	-37.741	2324	SO157	Haase (unpubl.)	EMP; ICPMS; TIMS	Gl	48.07	1.23	16.25	9.83				0.15	8.43	12.15	2.62	0.1	0.2	0.078	0.203	0.009			99.33	4.77	44	243	261	42.4	90.8	72.2	62.7	0.29	16.3	1.239	146	21.6	65.4	3.11	0.716	0.019	0.012	18.9	3.32	9.34
SO157 12DS3	South Ridge	FSC <5 Ma	-111.067	-37.741	2324	SO157	Haase (unpubl.)	EMP; ICPMS	Gl	48.38	1.27	16.08	10.11				0.19	8.26	12.19	2.65	0.11	0.19		0.163	0.011			99.59	4.65	39.5	237	336	49.5	116.721	85.3	52.3	0.29	17.1	1.1088	160	25.8	74.1	3.18	0.7769	0.0166	0.0188	17.85	3.39	9.85
SO100 84DS-1	North Ridge	FSC <5 Ma	-111.06	-37.4579	2208	SO100	Stroncik & Devey (2011) and Devey (unpubl.)	XRF; ICPMS; TIMS	Gl	50.39	1.689	14.86	10.2127	11.35			0.18	7.4	12.03	2.83	0.275	0.188						101.192
SO100 84DS-2GLAS	North Ridge	FSC <5 Ma	-111.06	-37.4579	2208	SO100	Stroncik & Devey (2011) and Devey (unpubl.); Maia et al. (2001)	XRF; ICPMS; TIMS	Gl	50.08	1.674	14.68	10.2217	11.36			0.18	7.21	11.98	2.807	0.284	0.214						100.469	3.43161	38.0766		113.824	50.0342	53.3355	77.3969	91.8329		16.5025	2.19647	196.442	29.6678	115.438	7.14239			0.0249197	29.9324	7.01717	17.9587
SO100 84DS-3GLAS	North Ridge	FSC <5 Ma	-111.06	-37.4579	2208	SO100	Stroncik & Devey (2011) and Devey (unpubl.)	XRF; ICPMS	Gl	49.85	1.671	14.65	10.1587	11.29			0.18	7.2	11.83	2.865	0.252	0.206						99.994	3.5583	37.8165		103.765	53.1009	52.4494	77.2791	93.0651		16.3059	2.10988	195.376	29.7058	113.534	6.98994			0.0193086	29.5026	6.91933	17.925
SO100 90DS-1	Rutherford	South System	-110.632	-38.36	1613	SO100	Haase (unpubl.)	EMP	Gl	50.08	1.23	16.3	8.69				0.16	8.37	12.27	2.41	0.1	0.2	0.056	0.101	0.007			99.97
SO100 90DS-2GLAS	Rutherford	South System	-110.632	-38.36	1613	SO100	Haase (ME, unpubl.), Devey (TE, unpubl.); Maia et al., 2001 (Pb-Iso.)	EMP; ICPMS; TIMS	Gl	50.61	1.26	15.9	9.3				0.14	7.83	12.16	2.53	0.1	0.21	0.068	0.209	0.003			100.32					50.8375	77.4609	89.4034	93.4686		17.7027	1.38481	166.97	25.955	77.9902	3.02268			0.0280579	15.7576	3.21028	9.24524
SO100 90DS-3GLAS	Rutherford	South System	-110.632	-38.36	1613	SO100	Haase (ME, unpubl.), Devey (TE, unpubl.)	EMP; ICPMS	Gl	52.63	1.54	15	10.29				0.19	7.06	11.82	1.09	0.11	0.25	0.015	0.239	0.003			100.25											1.54516	189.149	28.9991	99.969	3.29739			0.0208301	17.8455	3.43726	11.0872
SO100 93DS-1GLAS	Planck	South System	-111.548	-38.1344	1770	SO100	Haase (ME, unpubl.), Devey (TE, Iso., unpubl.)	EMP; ICPMS; TIMS	Gl	48.44	1.39	17.36	9.35				0.18	8.28	11.75	2.81	0.15	0.24	0.055	0.218	0.013			100.24											1.62286	216.802	24.2706	89.4405	4.25363			0.0146129	18.511	4.22373	11.6802
SO100 93DS-2	Planck	South System	-111.548	-38.1344	1770	SO100	Stroncik & Devey (2011) and Devey (unpubl.)	XRF	WR	47.8	1.335	17.33	8.83604	9.82			0.16	8.26	12.01	2.686	0.29	0.217						99.908
SO100 93DS-3	Planck	South System	-111.548	-38.1344	1770	SO100	Stroncik & Devey (2011) and Devey (unpubl.)	XRF	WR	47.29	1.333	17.11	9.02499	10.03			0.16	8.16	11.69	2.68	0.305	0.189						98.947
SO100 94DS-1	Platon	South System	-112.897	-37.8894	1600	SO100	Stroncik & Devey (2011) and Devey (unpubl.); Maia et al. (2001)	XRF; ICPMS; TIMS	WR	48.84	2.241	15.24	10.4287	11.59			0.17	6.58	11.54	3.031	0.512	0.333						100.077											6.96442	386.541	27.9389	168.035	16.9514			0.15099	62.8992	12.8326	28.1184
SO100 94DS-2	Platon	South System	-112.897	-37.8894	1600	SO100	Stroncik & Devey (2011) and Devey (unpubl.)	XRF; ICPMS	WR	48.87	2.675	14.69	11.7424	13.05			0.19	5.93	10.54	3.274	0.6	0.417						100.236											6.76431	406.036	34.2775	218.879	23.4072			0.072143	88.2399	16.9551	38.4627
SO100 94DS-3	Platon	South System	-112.897	-37.8894	1600	SO100	Stroncik & Devey (2011) and Devey (unpubl.)	XRF; ICPMS	WR	48.52	2.259	14.96	10.9056	12.12			0.35	6.47	11.22	2.976	0.561	0.363						99.799											5.19705	340.458	24.5177	149.749	15.2036			0.0530768	61.1368	11.3224	25.4264
SO100 94DS-4	Platon	South System	-112.897	-37.8894	1600	SO100	Stroncik & Devey (2011) and Devey (unpubl.)	XRF	WR	48.56	2.251	15.12	10.8426	12.05			0.38	6.34	11.23	3.006	0.552	0.34						99.829
SO100 95DS-1GLAS	Richter	South System	-112.418	-37.8885	1801	SO100	Stroncik & Devey (2011) and Devey (unpubl.); Maia et al. (2001)	XRF (ME: WR); ICPMS; TIMS	Gl/WR	49.64	2.05	14.86	10.1138	11.24			0.18	5.98	11.5	3.075	0.614	0.301						99.44					45.1597	33.6377	72.6656	113.548		19.8875	6.21941	296.239	35.0392	186.98	16.0586			0.0662337	71.0807	13.1032	32.1214
SO100 95DS-2	Richter	South System	-112.418	-37.8885	1801	SO100	Stroncik & Devey (2011) and Devey (unpubl.)	XRF	WR	50.3	2.071	15.08	10.0958	11.22			0.18	5.98	11.51	3.014	0.621	0.298						100.274
SO100 95DS-3GLAS	Richter	South System	-112.418	-37.8885	1801	SO100	Stroncik & Devey (2011) and Devey (unpubl.)	XRF; ICPMS	Gl	49.35	2.031	14.75	10.1497	11.28			0.18	6.23	11.39	3.013	0.567	0.285						99.076					47.5524	54.3399	74.0849	111.713		20.7997	5.69016	299.082	33.3662	170.944	15.8132			0.462588	62.1409	12.5887	30.2132
SO213 DR7a-1	Ridge SE' Richter	South System	-113.196	-38.101	2023	SO213	this study	XRF; ICPMS	WR	49.3	1.29	16.03	9.75				0.152	7.14	13.14	2.36	0.2	0.128					0.33	99.82	5	45.95	290.2	373.4	45.93	96.03	109.7	76			4.56	151.3	26.45	81.18	1.57				7.02	2.82	9.04
SO213 DR7a-2	Ridge SE' Richter	South System	-113.196	-38.101	2023	SO213	this study	XRF	WR	48.79	1.29	15.61	9.39				0.153	7.86	13.65	2.32	0.177	0.123					0.43	99.8			278	357	79.6	126	77.7	73.2		14.3	5	153	32.1	71.5	2.6
SO213 DR7a-3	Ridge SE' Richter	South System	-113.196	-38.101	2023	SO213	this study	XRF	WR	48.53	1.44	15.37	9.5				0.163	7.29	13.72	2.49	0.175	0.13					1.01	99.81			287	308	31.2	98.3	80.1	75.1		14.4	5.2	170	32.6	85.5	3.1				14.9
SO213 DR7a-4	Ridge SE' Richter	South System	-113.196	-38.101	2023	SO213	this study	XRF	WR	49.09	1.46	15.6	9.8				0.153	7.43	13.01	2.52	0.167	0.156					0.44	99.81			283	310	40.1	107	121	80.4		14.8	4.4	162	32.8	84.7	5				17.2
SO213 DR8a-3-a	Ridge SW' Richter	South System	-112.797	-38.3172	2507	SO213	this study	EMP; ICPMS; TIMS	Gl	48.52	2.01	14.1	10.84				0.21	6.49	11.09	3.21	0.3	0.26		0.21	0.01			97.24	4.95	46.67	329.5	214.3	49.01	62.28	85.26	92.09			5.34	136.7	28.98	89.79	3.08				15.62	3.72	10.91
SO213 DR8a-5	Ridge SW' Richter	South System	-112.797	-38.3172	2507	SO213	this study	XRF; ICPMS	WR	50.5	2.06	15.24	9.95				0.187	5.51	12.22	2.62	0.508	0.251					0.78	99.83	4.65	47.27	359.3	93.99	66.98	69.28	98.63	117.2			10.69	230.3	36.16	153	10.31				62.12	9.32	23.98
SO213 DR9-1	Ridge SW' Richter	South System	-112.797	-38.3172	2507	SO213	this study	XRF; ICPMS	WR	48.83	1.24	16.68	11.29				0.171	8.08	11.04	2.13	0.198	0.15					0	99.81	4.03	34.07	250.4	398.8	49.79	166.8	73.46	102.3			2.34	199.9	23.9	67.48	2.67				14.79	2.98	8.43
SO213 DR9-3-a	Ridge SW' Planck	South System	-112.156	-38.1705	2550	SO213	this study	EMP	Gl	48.85	1.26	16.53	10.63				0.21	8.02	10.88	2.75	0.1	0.12		0.17	0			99.54
SO213 DR9-3-b	Ridge SW' Planck	South System	-112.156	-38.1705	2550	SO213	this study	EMP; ICPMS; TIMS	Gl	48.31	1.21	16.22	9.97				0.17	7.88	10.43	2.76	0.1	0.14		0.17	0			97.37	4.68	34.03	251.8	447.9	48.89	156.8	70.87	99.87			0.83	190.7	23.68	66.68	2.57				11.57	2.95	8.3
SO213 DR10-1	Ridge SW' Planck	South System	-111.935	-38.33	2591	SO213	this study	XRF; ICPMS	WR	50.01	1.48	14.95	11.26				0.182	6.73	12.62	2.25	0.222	0.136					0	99.83	4.85	47.25	334	216.3	50.66	68.63	85.61	94.08			4.06	137.9	29.43	90.24	3.07				15.38	3.76	11.06
SO213 DR10-2	Ridge SW' Planck	South System	-111.935	-38.33	2591	SO213	this study	XRF	WR	50.13	1.47	14.89	11.4				0.188	6.73	12.56	2.07	0.245	0.149					0	99.83			316	204	37.1	51.2	92.4	86.6		15.6	5.6	131	31.2	76.5	4.5				34.7
SO213 DR10-4	Ridge SW' Planck	South System	-111.935	-38.33	2591	SO213	this study	XRF	WR	50.35	1.49	14.87	10.99				0.19	6.74	12.59	2.18	0.286	0.154					0	99.84			314	209	47.5	26.6	35	83.5		16.4	6.6	131	30.9	73.6	2.9				18.9
SO213 DR10-5	Ridge SW' Planck	South System	-111.935	-38.33	2591	SO213	this study	XRF	WR	50.58	1.41	14.67	11.1				0.188	6.67	12.43	2.09	0.313	0.124					0.27	99.84			324	154	40.1	38.3	105	92		16.9	7	122	32.7	62.8	2.9				37.5
FH12-05	Wegener	South System	-113.706	-37.9322	2770	Hotline (Atalante)	Hekinian et al., 1999; Maia et al., 2001	ICPMS; TIMS	Gl																					48.85		85.65	55.69	48.96	68.29	124.57			5.37	199.98	27.38	94.97	3.47				10.68	13.28	31.42
FH12-08	Wegener	South System	-113.706	-37.9322	2770	Hotline (Atalante)	Hekinian et al., 1999	EMP	Gl	49.21	2.25	14.47	11.01				0.24	6.46	10.55	3.51	0.46	0.31						98.48
FH12-09	Wegener	South System	-113.706	-37.9322	2770	Hotline (Atalante)	Hekinian et al., 1999	EMP	Gl	49.07	2.35	14.42	11.18				0.17	6.49	10.57	3.37	0.43	0.29						98.35
FH14-05	East-Moho. Ridge	South System	-113.579	-37.463	2598	Hotline (Atalante)	Hekinian et al., 1999; Maia et al., 2001	EMP; ICPMS; TIMS	Gl	46.15	2.9	14.13	11.87				0.19	9.35	8.65	3.49	0.7	0.51						97.94		32.73		226.58	53.59	167.11	52.58	130.55			9.16	411.06	40.15	266.46	26.13				118.16	21.16	47.8
FH14-06	East-Moho. Ridge	South System	-113.579	-37.463	2598	Hotline (Atalante)	Hekinian et al., 1999	EMP	Gl	46.96	2.62	15.52	11.57				0.2	6.35	10.1	3.69	0.54	0.39						97.93
FH14-07	East-Moho. Ridge	South System	-113.579	-37.463	2598	Hotline (Atalante)	Hekinian et al., 1999	EMP	Gl	47.76	3.04	16.11	10.34				0.22	5.94	9.26	3.85	0.95	0.7						98.16
SO213 DR5-1	Westerly Smts.	Westerly Smts.	-112.361	-36.304	1488	SO213	this study	XRF	WR	47.99	2.14	15.89	11.32				0.178	5.95	11.58	2.95	0.359	0.395					1.05	99.8			326	261	38.2	38.1	84.7	94.5		18.5	5.6	247	40	158	10.8				42.6
SO213 DR5-4	Westerly Smts.	Westerly Smts.	-112.361	-36.304	1488	SO213	this study	XRF	WR	47.28	1.3	22.89	6.78				0.112	4.78	13.62	2.19	0.227	0.26					0.39	99.83	7.31	25.94	196.4	215.1	27.13	63.44	47.97	59.55			1.78	403.7	20.84	107.7	5.84				24.53	6.16	16.37
SO213 DR3-1	Westerly Smts.	Westerly Smts.	-112.046	-36.117	2854	SO213	this study	XRF	WR	47.73	1.27	17.44	10.32				0.16	8.12	12.35	2.12	0.14	0.121					0.06	99.84			243	289	45.9	113	43	75.8		12.5	1.5	148	26.9	66.8	2.3				17.9
SO213 DR3-2	Westerly Smts.	Westerly Smts.	-112.046	-36.117	2854	SO213	this study	XRF	WR	48.03	1.29	17.6	9.61				0.16	8.48	12.4	2.01	0.153	0.126					0	99.85			244	299	40.7	58.5	7.7	72.9		14.5	3.4	147	28.7	66.1	2.6				36.4
SO213 DR3-4	Westerly Smts.	Westerly Smts.	-112.046	-36.117	2854	SO213	this study	XRF	WR	48.45	1.9	16.98	10.47				0.16	5.59	12.17	2.45	0.403	0.267					0.97	99.81			315	274	29.7	24.1	14.2	89.5		17.9	10.4	217	38.5	120	9				34.7
SO213 DR3-3-b	Westerly Smts.	Westerly Smts.	-112.046	-36.1171	2854	SO213	this study	EMP; ICPMS; TIMS	Gl	48.47	1.2	16.95	8.65				0.16	8.92	11.86	2.63	0.08	0.09		0.16	0.03			99.2	7.93	40.45	274	311.7	46.27	118.2	84.93	102.5			1.31	161.9	25.38	82.88	3.24				15.69	3.65	10.26
SO213 DR2-1-a	Westerly Smts.	Westerly Smts.	-111.836	-35.8493	2352	SO213	this study	EMP; ICPMS; TIMS	Gl	49.97	1.69	14.72	10.12				0.2	7.38	11.89	3.18	0.11	0.15		0.19	0.01			99.63	5.73	49.7	337	360.2	43.91	66.38	92.58	94.14			4.49	159.2	32.81	103.9	3.18				17.23	3.9	12.01
SO213 DR2-1-b	Westerly Smts.	Westerly Smts.	-111.836	-35.8493	2352	SO213	this study	EMP	Gl	49.45	1.65	14.7	10.03				0.19	7.39	11.87	3.14	0.11	0.15		0.21	0.01			98.91
SO213 DR2-2-a	Westerly Smts.	Westerly Smts.	-111.836	-35.8493	2352	SO213	this study	EMP; ICPMS; TIMS	Gl	49.09	1.67	14.7	10.01				0.19	7.33	11.88	3.14	0.11	0.16		0.19	0.01			98.51	5.5	49.94	340.3	348.2	48.37	68.67	93.61	91.32			4.18	156.7	33.09	103.9	3.13				12.41	3.9	12.09
SO213 DR2-2-b	Westerly Smts.	Westerly Smts.	-111.836	-35.8493	2352	SO213	this study	EMP	Gl	49.59	1.67	14.73	9.99				0.2	7.33	11.85	3.16	0.11	0.16		0.19	0.01			99.01
SO213 DR6-1	Westerly Smts.	Westerly Smts.	-111.606	-36.175	1928	SO213	this study	XRF	WR	48.9	1.37	16.49	9.46				0.153	6.66	12.98	2.51	0.149	0.127					1.02	99.82			268	339	38.6	70.7	25	69.6		13.4	4.5	249	28.9	75.5	3.1				13.6
SO213 DR6-2	Westerly Smts.	Westerly Smts.	-111.606	-36.175	1928	SO213	this study	XRF	WR	49.93	1.58	15.37	9.9				0.157	6.91	12.71	2.5	0.301	0.162					0.3	99.81	5.43	46.33	319.5	351	50.37	75.45	100.5	87.03			6.08	158.5	30.06	99.8	3.04				10.06	3.72	11.68
SO213 DR6-3	Westerly Smts.	Westerly Smts.	-111.606	-36.175	1928	SO213	this study	XRF	WR	48.97	1.36	16.41	9.68				0.158	7.8	12.68	2.34	0.189	0.124					0.11	99.82			268	333	32.1	118	87.4	71.2		15.1	3.3	144	28.7	79.2	5.6				18.8
SO213 DR6-4	Westerly Smts.	Westerly Smts.	-111.606	-36.175	1928	SO213	this study	XRF	WR	46.55	1.05	21.44	9.14				0.154	4.7	13.43	2.26	0.082	0.162					0.87	99.84			214	238	49.8	97.6	83.6	67.5		14.8	3.4	186	23.1	59.5	3.6				34.6
SO213 DR6-5	Westerly Smts.	Westerly Smts.	-111.606	-36.175	1928	SO213	this study	XRF	WR	48.61	1.35	16.29	9.16				0.119	6.46	13	2.49	0.177	0.12					2.04	99.81			268	329	55.2	87.6	70	69.2		12.9	4.9	301	29.8	79	2.5				32.8
SO157 49DS-4	Smt.	off-axis	-111.387	-41.373	2218	SO157	Haase (unpubl.)	EMP; ICPMS	Gl	50.03	1.3	15.53	9.32				0.14	8.44	12.63	2.57	0.05	0.18		0.132	0.008			100.33	5.07	40.1	261	367	44.9	86.9	91.1	48.7	0.19	16.4	0.15	104	29.4	75.3	0.88	0.81	0.01	0.004	1.175	2.041	7.472
SO157 49DS-6	Smt.	off-axis	-111.387	-41.373	2218	SO157	Haase (unpubl.)	EMP	Gl	50.12	1.31	15.53	9.24				0.16	8.41	12.62	2.58	0.05	0.19		0.133	0.008			100.34
SO157 49DS1	Smt.	off-axis	-111.387	-41.373	2218	SO157	Haase (unpubl.)	EMP; ICPMS; TIMS	Gl	49.78	1.48	15.14	9.95				0.18	7.98	12.36	2.78	0.06	0.19		0.139	0.004	0.29		100.05											0.128		32.2	99.9	0.92			0.001	2.355	2.625	9.146
SO157 49DS2	Smt.	off-axis	-111.387	-41.373	2218	SO157	Haase (unpubl.)	EMP	Gl	50.02	1.48	15.25	9.85				0.19	7.94	12.39	2.79	0.05	0.19		0.139	0.003			100.29
SO157 34DS1	W' PAR at Planck	off-axis	-111.186	-38.214	2233	SO157	Haase (unpubl.)	EMP; ICPMS; TIMS	Gl	49.05	1.16	17.04	8.86				0.16	9.65	11.26	2.72	0.05	0.17	0.068	0.154	0.002			100.34	3.79	35.5	198	359	44.3	215	61.3	56.7	0.21	15.2	0.388	204	18.7	60	1.03	0.682	0.013	0.004	8.37	2.21	7.3
SO157 34DS4	W' PAR at Planck	off-axis	-111.186	-38.214	2233	SO157	Haase (unpubl.)	EMP; ICPMS; TIMS	Gl	49.04	1.17	17.03	9.14				0.17	9.49	11.25	2.73	0.05	0.18		0.157	0.001			100.4	3.86	33.7	200	446	51.7	254	72.4	48.8	0.21	16.3	0.331	215	23	69	1.09	0.76	0.01	0.006	8.23	2.3	7.91
SO157 37DS-1	E' PAR at Planck	off-axis	-111	-38.277	2150	SO157	Haase (unpubl.)	EMP; ICPMS; TIMS	Gl	50.21	1.37	14.24	11.21				0.18	7.56	12.28	2.52	0.08	0.14		0.348	0.005			100.12	5.56	46.296	310	139	49	39	84.01	61.499	0.36	17.347	0.864	112	31.2	75.9	2.29	0.924	0.015	0.017	11.259	2.975	8.862
SO157 37DS-3	E' PAR at Planck	off-axis	-111	-38.277	2150	SO157	Haase (unpubl.)	EMP	Gl	50.36	1.36	14.31	11.17				0.19	7.55	12.28	2.52	0.08	0.14		0.341	0.004			100.31
SO157 37DS-4	E' PAR at Planck	off-axis	-111	-38.277	2150	SO157	Haase (unpubl.)	EMP; ICPMS	Gl	50.17	1.36	14.19	11.13				0.18	7.52	12.28	2.54	0.08	0.14		0.339	0.006			99.94	5.44	46.045	310	139	48.9	36	81.817	60.264	0.49	17.183	0.85	111	30.9	75.6	2.27	0.846	0.017	0.017	10.749	2.85	8.806
SO157 38DS-1	E' PAR at Planck	off-axis	-110.86	-38.3	2426	SO157	Haase (unpubl.)	EMP	Gl	48.05	0.96	17.12	10				0.18	9.31	11.84	2.33	0.05	0.13		0.15	0			100.14
SO157 38DS-2	E' PAR at Planck	off-axis	-110.86	-38.3	2426	SO157	Haase (unpubl.)	EMP	Gl	48.94	1.24	16.6	8.59				0.15	9.04	12.55	2.33	0.12	0.17		0.13	0			99.86
SO157 38DS-4	E' PAR at Planck	off-axis	-110.86	-38.3	2426	SO157	Haase (unpubl.)	EMP; ICPMS; TIMS	Gl	48.34	1.18	17.04	8.64				0.11	9.26	12.57	2.24	0.12	0.21		0.13	0			99.86	3.91	34.468	214	339	46.6	171	70.19	47.494	0.32	15.648	1.127	174	20.6	74.6	3.17	0.807	0.014	0.019	15.735	3.974	11.176
SO157 38DS-7	E' PAR at Planck	off-axis	-110.86	-38.3	2426	SO157	Haase (unpubl.)	EMP	Gl	48.5	1.15	16.9	8.22				0.15	9.29	12.53	2.27	0.11	0.16		0.12	0			99.4
PAC2 DR43-1	S overlapper	off-axis	-111.033	-40.535	1600		Labidi et al., 2014			49.45	0.97	16.32	8.16				0.15	8.93	11.95	2.34	0.05	0.16													56
ATAPACA2-039-004	S overlapper	off-axis	-111.685	-41.253	2050		BEZARD, 2016; LABIDI, 2014	CALC; EMP; LA-ICPMS; MC-ICP-MS; TIMS; Unknown	Gl	49.08	1.35	15.55	11.89				0.18	8.86	9.64	2.86	0.05	0.31								31	193	469	62	350	109				0.24	100	25	64	1.21				2.7	1.68	5.6
SO157 48DS-1	S overlapper	PAR	-111.27	-41.488	2536	SO157	Haase (unpubl.)	XRF	WR	67.03	0.49	13.17	4.87				0.13	0.85	3	5.39	1.46	0.1						99.04
SO157 46DS1	S overlapper	PAR	-111.25	-41.716	2500	SO157	Haase (unpubl.)	XRF	WR	49.53	1.55	14.55	10.15				0.18	7.58	11.82	2.56	0.13	0.14						99.44
SO157 46DS2	S overlapper	PAR	-111.25	-41.716	2500	SO157	Haase (unpubl.)	EMP; ICPMS; TIMS	Gl	50.1	1.68	15.47	9.2				0.16	7.74	12.1	2.66	0.31	0.3		0.127	0.015	0.4		99.87	4.37	31.5	278	292	38.1	89.8	67.2	72.5	0.718	17.5	4.214	171	26.5	106	8.96	1.119	0.027	0.073	52.014	7.469	18.487
SO157 52DS1	Foundation Segment	PAR	-111.553	-41.181	2531	SO157	Haase (unpubl.)	EMP; ICPMS; TIMS	Gl	50.04	2.17	14.34	11.7				0.21	7.09	11.12	2.81	0.09	0.28		0.177	0.053			100.06											0.735		48.5	147	2.56			0.011	7.233	4.14	13.807
SO157 52DS4	Foundation Segment	PAR	-111.553	-41.181	2531	SO157	Haase (unpubl.)	EMP	Gl	50.12	2.21	14.21	11.81				0.21	6.92	11.19	2.81	0.09	0.29		0.184	0.052			100.1
SO157 52DS5	Foundation Segment	PAR	-111.553	-41.181	2531	SO157	Haase (unpubl.)	EMP; ICPMS	Gl	50.04	2.22	14.2	11.89				0.2	6.96	11.2	2.82	0.09	0.29		0.179	0.051			100.13											0.706		48	147	2.57			0.007	7.59	4.134	13.763
SO157 53DS1	Foundation Segment	PAR	-111.538	-41.009	2474	SO157	Haase (unpubl.)	EMP; ICPMS	Gl	50.46	1.89	14.23	11.22				0.21	7.3	11.71	2.7	0.08	0.25		0.163	0.013	0.19		100.24											0.718		42.5	124	2.42			0.007	7.613	3.628	11.779
SO157 53DS2	Foundation Segment	PAR	-111.538	-41.009	2474	SO157	Haase (unpubl.)	EMP	Gl	49.33	1.89	14.18	11.23				0.19	7.33	11.7	2.74	0.09	0.25		0.153	0.014			99.08
SO157 53DS3	Foundation Segment	PAR	-111.538	-41.009	2474	SO157	Haase (unpubl.)	EMP; ICPMS	Gl	49.47	1.49	15.95	9.93				0.18	8.18	11.94	2.8	0.09	0.2		0.134	0.009			100.37											0.432		30.7	94	1.6			0.004	5.495	2.84	9.258
SO157 53DS5	Foundation Segment	PAR	-111.538	-41.009	2474	SO157	Haase (unpubl.)	EMP	Gl	49.37	1.49	16.06	9.94				0.16	8.05	12.11	2.82	0.08	0.22		0.131	0.008			100.44
SO157 53DS6	Foundation Segment	PAR	-111.538	-41.009	2474	SO157	Haase (unpubl.)	EMP; ICPMS	Gl	49.34	1.49	15.83	10.02				0.18	8.28	11.96	2.75	0.08	0.22		0.135	0.011			100.3											0.411		30.1	92.4	1.57			0.004	5.848	2.802	9.034
SO157 53DS7	Foundation Segment	PAR	-111.538	-41.009	2474	SO157	Haase (unpubl.)	EMP	Gl	49.37	1.5	15.91	9.97				0.16	8.1	12	2.83	0.08	0.21		0.139	0.01			100.28
SO157 53DS8	Foundation Segment	PAR	-111.538	-41.009	2474	SO157	Haase (unpubl.)	EMP	Gl	49.31	1.49	15.96	9.85				0.16	8.2	11.97	2.82	0.07	0.21		0.137	0.007			100.18
SO157 50DS4	S overlapper	PAR	-111.51	-41.386	2464	SO157	Haase (unpubl.)	EMP; ICPMS; TIMS	Gl	50.55	1.97	13.9	11.85				0.2	7.1	11.66	2.6	0.07	0.24		0.18	0.01			100.33											0.624		43.7	119	1.96			0.008	6.415	3.307	11.064
SO157 51DS1	S overlapper	PAR	-111.51	-41.312	2443	SO157	Haase (unpubl.)	XRF	WR	49.62	1.56	13.9	11.22				0.2	7.21	11.9	2.39	0.12	0.15						99.66
SO157 51DS2	S overlapper	PAR	-111.51	-41.312	2443	SO157	Haase (unpubl.)	XRF	WR	49.47	1.56	13.86	11.29				0.2	7.1	11.84	2.38	0.12	0.14						99.36
SO157 51DS3	S overlapper	PAR	-111.51	-41.312	2443	SO157	Haase (unpubl.)	EMP; ICPMS	Gl	50.37	1.88	14.08	11.42				0.19	7.3	11.81	2.55	0.07	0.23		0.17	0.02	0.24		100.08											0.532		42.2	115	1.83			0.005	5.913	3.123	10.545
SO157 51DS4	S overlapper	PAR	-111.51	-41.312	2443	SO157	Haase (unpubl.)	EMP	Gl	50.44	1.88	14.15	11.32				0.19	7.32	11.85	2.55	0.07	0.24		0.17	0.02			100.2
SO157 54DS1	Foundation Segment	PAR	-111.475	-40.77	2436	SO157	Haase (unpubl.)	EMP; ICPMS; TIMS	Gl	50.37	1.95	13.93	11.66				0.22	7.27	11.54	2.74	0.09	0.26	0.061	0.218	0.017	0.23		100.32	7.58	49.7	392	228	40.4	60.1	52.4	87.1	0.31	19.2	0.734	110	39.6	123	2.3	1.15	0.016	0.008	8.172	3.937	12.925
SO157 54DS2	Foundation Segment	PAR	-111.475	-40.77	2436	SO157	Haase (unpubl.)	EMP	Gl	50.41	1.99	14.08	11.72				0.18	7.19	11.56	2.71	0.1	0.27	0.034	0.248	0.015			100.53
SO157 54DS3	Foundation Segment	PAR	-111.475	-40.77	2436	SO157	Haase (unpubl.)	EMP	Gl	49.97	2.01	14.06	11.65				0.2	7.16	11.55	2.71	0.1	0.25		0.154	0.015			99.82
SO157 54DS4	Foundation Segment	PAR	-111.475	-40.77	2436	SO157	Haase (unpubl.)	EMP	Gl	49.65	1.95	13.93	11.61				0.18	7.14	11.33	2.7	0.09	0.26		0.22	0.014			99.08
SO157 55DS1	Foundation Segment	PAR	-111.474	-40.581	2422	SO157	Haase (unpubl.)	EMP	Gl	50.5	2.1	13.8	12.13				0.19	7.09	11.52	2.76	0.1	0.29	0.032	0.227	0.026	0.25		100.77
SO157 60DS1	Foundation Segment	PAR	-111.465	-40.139	2365	SO157	Haase et al., 2005	EMP; ICPMS; TIMS	Gl	50.05	2.32	14.01	11.76				0.18	6.46	10.96	2.87	0.16	0.31	0.047	0.221	0.045	0.31		99.38	6.83	35.7	370	194	39.7	62.6	50.9	109	0.503	20.1	1.727	126	45.3	151	4.75	1.609	0.033	0.049	19.953	5.984	18.082
SO157 56DS1	Foundation Segment	PAR	-111.46	-40.388	2334	SO157	Haase et al., 2005	EMP; ICPMS; TIMS	Gl	50.18	2.52	13.73	13.37				0.19	5.9	10.43	2.97	0.16	0.34	0.053	0.241	0.062	0.38		100.16	9.12	47.1	430	132	39.6	43.8	45.2	103	0.581	21.1	1.894	124	52.9	181	5.95	1.64	0.021	0.019	23.356	7.048	21.182
SO157 56DS2	Foundation Segment	PAR	-111.46	-40.388	2334	SO157	Haase (unpubl.)	EMP	Gl	49.97	2.56	13.76	13.26				0.21	5.96	10.39	3.02	0.18	0.36	0.038	0.28	0.06			100.04
SO157 56DS3	Foundation Segment	PAR	-111.46	-40.388	2334	SO157	Haase (unpubl.)	EMP	Gl	49.24	2.59	13.38	13.14				0.22	6.25	10.53	3.03	0.18	0.34		0.172	0.063			99.13
SO157 63DS1	Foundation Segment	PAR	-111.427	-39.804	2257	SO157	Haase et al., 2005; Freund et al., 2013	EMP; ICPMS; TIMS	Gl	57.24	1.64	13.05	11.85				0.19	1.99	5.78	4.31	0.65	0.78	0.027	0.126	0.659	2.6		98.3	19.8	22.5	60.3	3.684	16.252	4.566	26.229	157.87	2.22	28.8	7.172	118	152	762	19.8	5.484	0.062	0.096	70.394	26.751	78.372
SO157 63DS2	Foundation Segment	PAR	-111.427	-39.804	2257	SO157	Freund et al., 2013	EMP	Gl	57.31	1.71	13.08	12.19				0.22	1.99	5.74	4.34	0.69	0.78	0.045	0.152	0.643			98.89
SO157 63DS3	Foundation Segment	PAR	-111.427	-39.804	2257	SO157	Freund et al., 2013	EMP	Gl	59.11	1.68	12.64	11.54				0.2	1.79	5.61	4.26	0.73	0.56		0.1	0.56			98.8
SO157 63DS4	Foundation Segment	PAR	-111.427	-39.804	2257	SO157	Freund et al., 2013	EMP	Gl	57.53	1.54	13.31	11.29				0.18	1.83	5.52	4.49	0.75	0.57		0.103	0.882			97.99
SO157 61DS1	Foundation Segment	PAR	-111.416	-40.123	2422	SO157	Haase (unpubl.)	EMP; ICPMS; TIMS	Gl	50.08	2.18	13.75	12.04				0.2	6.85	11.38	2.7	0.1	0.2		0.142	0.03			99.66	6.36	35	358	235	40.3	64.5	54.3	102	0.367	19.3	1.053	100	41.9	127	3.005	1.373	0.022	0.052	11.136	4.386	13.909
SO157 61DS2	Foundation Segment	PAR	-111.416	-40.123	2422	SO157	Haase (unpubl.)	EMP	Gl	49.92	2.19	13.89	12.07				0.2	7.01	11.39	2.72	0.12	0.29	0.051	0.256	0.032			100.13
SO157 61DS3	Foundation Segment	PAR	-111.416	-40.123	2422	SO157	Haase (unpubl.)	EMP	Gl	49.98	2.21	13.5	12.11				0.2	6.79	11.39	2.7	0.1	0.2		0.151	0.033			99.37
SO157 65DS1	Foundation Segment	PAR	-111.343	-39.505	2196	SO157	Haase et al., 2005; Freund et al., 2013	EMP; ICPMS; TIMS	Gl	67.98	0.6	12.38	6.14				0.11	0.5	2.67	4.7	1.35	0.13	0.019	0.025	0.869	1.78		97.47	24.8	9.91	20.8	2.402	5.715	1.564	10.741	94.15	2.47	29.7	17.975	76.5	162	850	23.2	11.47	0.116	0.171	132.503	39.644	104.598
SO157 65DS2	Foundation Segment	PAR	-111.343	-39.505	2196	SO157	Haase et al., 2005; Freund et al., 2013	EMP; ICPMS; TIMS	Gl	58.34	1.75	12.51	12.07				0.22	2	5.71	4.36	0.71	0.56	0.023	0.159	0.53			98.96	15.4	24	84.1	7.204	20.186	5.439	22.191	138.98	2	27.8	8.869	117	125	630	18.1	6.236	0.064	0.118	85.068	25.926	71.079
SO157 65DS4	Foundation Segment	PAR	-111.343	-39.505	2196	SO157	Freund et al., 2013	EMP	Gl	68.01	0.6	12.34	6.33				0.12	0.5	2.75	4.57	1.39	0.14		0.022	0.844			97.62
SO213 10VSRa	Foundation Segment	PAR	-111.276	-39.333	2161	SO213	this study	EMP; ICPMS; TIMS	Gl	60.98	1.63	13.07	11.36				0.2	1.76	5.29	4.22	0.81	0.46		0.1	0.54			100.32	18	20.73	88.24	2.51	19.9	3.82	26.51	129.3			11.23	118.5	135.3	731.6	20.88				92.7	30.28	82.46
SO213 10VSRb	Foundation Segment	PAR	-111.276	-39.333	2161	SO213	this study	EMP	Gl	59.69	1.65	12.88	11.55				0.21	1.82	5.35	4.24	0.78	0.49		0.11	0.52			99.22
SO213 9VSRa	Foundation Segment	PAR	-111.243	-39.176	2233	SO213	Freund et al., 2013; this study	EMP; ICPMS; TIMS	Gl	59.67	1.65	12.9	11.2				0.21	2.05	5.65	4.2	0.73	0.41		0.12	0.5			99.2	16.59	22.03	114.9	4.29	21.54	5.67	30.39	135.3			10.21	118.7	127.2	633.7	20.01				86.96	26.41	73.05
SO213 9VSRb	Foundation Segment	PAR	-111.243	-39.176	2233	SO213	Freund et al., 2013	EMP	Gl	60.18	1.68	12.95	11.42				0.21	2.03	5.63	4.19	0.75	0.41		0.12	0.51			99.98
SO213 8VSRa	Foundation Segment	PAR	-111.213	-39.004	2272	SO213	Freund et al., 2013	EMP	Gl	50.75	1.78	14.04	11.48				0.19	6.91	11.4	2.87	0.16	0.18		0.19	0.02			99.98
SO213 8VSRb	Foundation Segment	PAR	-111.213	-39.004	2272	SO213	Freund et al., 2013; this study	EMP; ICPMS; TIMS	Gl	50.82	1.79	14.18	11.57				0.22	6.83	11.44	2.87	0.17	0.18		0.21	0.02			100.3	6.21	47.08	370.9	98.3	48.49	50.45	77.29	101.2			1.79	145	34.11	111.5	5.28				24.81	5.3	14.68
SO213 7VSR a	Foundation Segment	PAR	-111.191	-38.8608	2237	SO213	Freund et al., 2013; this study	EMP; ICPMS; TIMS	Gl	60	1.66	12.95	11.76				0.22	1.86	5.45	4.27	0.78	0.52		0.12	0.52			100.01	17.46	21.27	88.33	2.31	20.46	3.8	27.17	140			10.84	121.9	135.3	718.6	21.03				91.46	29.97	82.44
SO213 7VSR b	Foundation Segment	PAR	-111.191	-38.8608	2237	SO213	Freund et al., 2013	EMP	Gl	61.02	1.6	12.92	11.38				0.18	1.81	5.34	4.17	0.81	0.49		0.09	0.55			100.26
SO213 6VSR 1a	Foundation Segment	PAR	-111.155	-38.7095	2250	SO213	Freund et al., 2013	EMP; ICPMS	Gl	49.6	1.71	14.24	10.59				0.19	7.08	11.49	2.79	0.17	0.17		0.19	0.02			98.26	6.07	48.82	372	182.1	47.64	56.22	80.83	98.81			2.11	161.3	34.05	116.4	6.09				27.61	5.87	15.92
SO213 6VSR 1 b	Foundation Segment	PAR	-111.155	-38.7095	2250	SO213	Freund et al., 2013	EMP	Gl	49.83	1.73	14.49	10.9				0.18	7.08	11.61	2.76	0.17	0.17		0.2	0.02			99.18
FH9-01	Foundation Segment	PAR	-111.15	-38.6973	2273	Hotline (Atalante)	Hekinian et al., 1999	EMP	Gl	50.53	1.67	14.02	10.61				0.24	7.37	11.9	2.76	0.13	0.09						99.35
FH9-02	Foundation Segment	PAR	-111.15	-38.6973	2273	Hotline (Atalante)	Hekinian et al., 1999; Maia et al., 2001	EMP; ICPMS; TIMS	Gl	50.54	1.67	13.93	10.35				0.23	7.23	11.9	2.67	0.15	0.16						98.88		54.15		287.23	57.34	74.48	86.1	107.32			2.22	171.29	34.63	118.89	6.54				26.92	6.21	15.95
FH9-03	Foundation Segment	PAR	-111.15	-38.6973	2273	Hotline (Atalante)	Hekinian et al., 1999	EMP	Gl	50.37	1.5	13.9	10.45				0.17	7.49	12.28	2.69	0.09	0.08						99.06
FH9-04	Foundation Segment	PAR	-111.15	-38.6973	2273	Hotline (Atalante)	Hekinian et al., 1999	EMP	Gl	50.58	1.5	13.97	10.56				0.16	7.44	12.05	2.7	0.11	0.11						99.2
FH9-05	Foundation Segment	PAR	-111.15	-38.6973	2273	Hotline (Atalante)	Hekinian et al., 1999	EMP	Gl	50.61	1.68	13.88	10.57				0.24	7.23	11.88	2.8	0.14	0.19						99.25
FH9-07	Foundation Segment	PAR	-111.15	-38.6973	2273	Hotline (Atalante)	Hekinian et al., 1999	EMP	Gl	50.24	1.81	13.65	10.94				0.19	7.09	11.52	2.81	0.14	0.14						98.57
FH9-09	Foundation Segment	PAR	-111.15	-38.6973	2273	Hotline (Atalante)	Hekinian et al., 1999	EMP	Gl	50.23	1.72	13.86	10.77				0.21	7.19	11.91	2.78	0.13	0.16						98.99
FH9-11	Foundation Segment	PAR	-111.15	-38.6973	2273	Hotline (Atalante)	Hekinian et al., 1999	EMP	Gl	50.69	1.52	13.95	10.55				0.22	7.5	12.06	2.69	0.12	0.11						99.49
FH9-13	Foundation Segment	PAR	-111.15	-38.6973	2273	Hotline (Atalante)	Hekinian et al., 1999	EMP	Gl	50.24	1.54	13.89	10.44				0.15	7.52	12.11	2.69	0.11	0.07						98.8
Atalante FH DR 09-02	Foundation Segment	PAR	-111.15	-38.697	2273	Hotline (Atalante)	Freund et al., 2013	EMP	Gl	50	1.67	14.4	10.84				0.18	7.31	11.84	2.7	0.15	0.19		0.323	0.016			99.61
SO157 45DS1	Foundation Segment	PAR	-111.131	-38.585	2269	SO157	Haase et al., 2005; Freund et al., 2013	EMP; ICPMS; TIMS	Gl	50.01	1.62	14.74	10.46				0.2	7.72	11.97	2.71	0.14	0.24	0.052	0.21	0.014	0.4		100.08	4.971	35.331	292.986	267.37	41.087	72.985	64.889	87.477	0.437	17.8	1.789	140	32.5	109	4.429	1.228	0.061	0.048	22.721	5.028	14.354
SO157 45DS2	Foundation Segment	PAR	-111.131	-38.585	2269	SO157	Freund et al., 2013	EMP	Gl	49.02	1.64	14.92	10.52				0.2	7.71	11.99	2.69	0.14	0.25	0.054	0.214	0.015			99.36
SO157 44DS1	Foundation Segment	PAR	-111.103	-38.493	2255	SO157	Haase et al., 2005; Freund et al., 2013	EMP; ICPMS; TIMS	Gl	49.67	1.46	15.2	9.73				0.15	7.92	12.38	2.79	0.06	0.21	0.056	0.186	0.004	0.3		99.82	5.941	48.263	327.704	239.2	39.394	57.224	63.59	73.858	0.408	17.6	1.677	141	28.1	96.7	4.891	0.96	0.017	0.018	24.454	4.885	13.649
SO157 44DS2	Foundation Segment	PAR	-111.103	-38.493	2255	SO157	Freund et al., 2013	EMP	Gl	49.8	1.77	14.35	10.99				0.19	7.19	11.36	2.82	0.15	0.25	0.044	0.219	0.048			99.19
SO157 44DS3	Foundation Segment	PAR	-111.103	-38.493	2255	SO157	Freund et al., 2013	EMP	Gl	49.95	1.67	14.44	10.57				0.19	7.46	12.06	2.69	0.15	0.26		0.133	0.018			99.58
SO157 44DS4	Foundation Segment	PAR	-111.103	-38.493	2255	SO157	Freund et al., 2013	EMP	Gl	50.22	1.64	14.44	10.69				0.19	7.49	11.98	2.71	0.14	0.26		0.2	0.017			99.97
SO157 42DS1	Foundation Segment	PAR	-111.082	-38.417	2263	SO157	Haase et al., 2005; Freund et al., 2013	EMP; ICPMS; TIMS	Gl	50.54	1.59	14.44	10.62				0.18	7.51	12.05	2.69	0.16	0.25	0.053	0.221	0.017			100.33	4.93	38.702	306	227	40.9	64.4	67.5	87.5	0.437	18.1	2.019	142	29.2	96.1	4.948	1.115	0.032	0.062	25.772	5.03	13.756
SO157 42DS2	Foundation Segment	PAR	-111.082	-38.417	2263	SO157	Freund et al., 2013	EMP	Gl	50.41	1.64	14.5	10.65				0.18	7.41	12.02	2.66	0.15	0.26		0.203	0.015			100.1
SO157 42DS3	Foundation Segment	PAR	-111.082	-38.417	2263	SO157	Freund et al., 2013	EMP	Gl	49.88	1.66	14.49	10.58				0.2	7.41	12.08	2.68	0.17	0.26		0.138	0.02			99.57
SO157 42DS5	Foundation Segment	PAR	-111.082	-38.417	2263	SO157	Freund et al., 2013	EMP	Gl	49.87	1.72	14.46	10.69				0.2	7.28	11.8	2.77	0.16	0.27		0.182	0.02			99.42
SO157 42DS6	Foundation Segment	PAR	-111.082	-38.417	2263	SO157	Freund et al., 2013	EMP	Gl	49.87	1.63	14.54	10.53				0.19	7.5	12.06	2.69	0.16	0.25		0.176	0.017			99.61
SO157 40DS1	Foundation Segment	PAR	-111.073	-38.338	2258	SO157	Haase et al., 2005; Freund et al., 2013	EMP; ICPMS; TIMS	Gl	50.44	1.55	14.68	10.3				0.17	7.68	12.16	2.67	0.15	0.25	0.072	0.208	0.013	0.32		100.34	4.7	36.007	292	274	39.9	68.7	68.4	388.5	0.42	17.5	1.77	135	28	89.4	4.298	1.288	0.049	0.055	22.864	4.567	12.643
SO157 40DS2	Foundation Segment	PAR	-111.073	-38.338	2258	SO157	Freund et al., 2013	EMP	Gl	49.04	1.64	14.6	10.37				0.18	7.68	11.86	2.68	0.17	0.25	0.064	0.218	0.014			98.77
SO157 40DS3	Foundation Segment	PAR	-111.073	-38.338	2258	SO157	Freund et al., 2013	EMP	Gl	49.94	1.57	14.63	10.31				0.19	7.61	12.15	2.63	0.15	0.25		0.176	0.014			99.62
SO157 36DS1	Foundation Segment	PAR	-111.05	-38.215	2245	SO157	Haase et al., 2005; Freund et al., 2013	EMP; ICPMS; TIMS	Gl	49.41	1.64	14.66	10.54				0.17	7.55	11.83	2.73	0.15	0.27	0.047	0.216	0.019	0.35		99.22	5.93	28.957	358	213	39.5	64.5	60.1	73.2	0.433	17.6	1.881	147	29.4	96.6	5.522	0.953	0.008	0.014	26.262	5.494	14.541
SO157 36DS2	Foundation Segment	PAR	-111.05	-38.215	2245	SO157	Freund et al., 2013	EMP	Gl	49.08	1.68	14.74	10.64				0.16	7.5	11.77	2.7	0.16	0.26	0.045	0.224	0.02			98.98
SO100 92DS1	Foundation Segment	PAR	-111.044	-38.156	2259	SO100	Haase et al., 2005; Freund et al., 2013	EMP; ICPMS	Gl	55.7	1.51	14.19	10.05				0.17	3.55	7.38	4.11	0.72	0.41		0.088	0.811			98.69	13.8	16.2	155	58.1	22.9	22.3	29.1	78.7	1.892	22.7	10.16	128	83.9	566	21.7	5.206	0.056	0.095	90.677	26.462	65.222
SO100 92DS3	Foundation Segment	PAR	-111.044	-38.156	2259	SO100	Freund et al., 2013	EMP	Gl	55.27	1.5	14.13	10.1				0.16	3.5	7.36	4.33	0.72	0.41		0.077	0.824			98.37
SO100 92DS-2GLAS	Foundation Segment	PAR	-111.043	-38.1558	2259	SO100	Hekinian et al., (1997; ME); Devey (TE, Iso., unpubl.)	EMP; ICPMS; TIMS	Gl	57.69	1.47	13.7	9.82				0.2	3.08	6.54	3.08	0.8	0.33						96.75	11.5854	19.897		49.4021	24.9499	14.6679	31.9232	102.888		21.6454	12.4198	127.308	107.92	615.07	26.3087			0.145202	106.458	31.8952	78.4078
SO100 92DS-4	Foundation Segment	PAR	-111.043	-38.1558	2259	SO100	Stroncik & Devey (2011) and Devey (unpubl.)	XRF	WR	56.54	1.472	14.34	10.1677	11.3			0.16	3.52	7.46	4.439	0.691	0.343						100.265
SO100 91DS1	Foundation Segment	PAR	-111.003	-38.092	2197	SO100	Haase et al., 2005; Freund et al., 2013; Devey (Iso., unpubl.)	EMP; ICPMS; TIMS	Gl	60.19	1.28	13.48	8.94				0.14	1.88	5.12	4.35	1.1	0.38		0.052	0.897			97.82	16.2	21.92	71.6	13.9019	17.1371	7.6436	28.9769	105.946	2.85	25.4094	17.5095	111	109	748	29	7.6797	0.0943	0.2113	146.626	36.2242	89.4493
SO100 91DS5	Foundation Segment	PAR	-111.003	-38.092	2197	SO100	Freund et al., 2013	EMP	Gl	61.65	1.17	13.13	8.49				0.13	1.35	4.4	4.56	1.17	0.42		0.056	0.971			97.51
SO100 91DS6	Foundation Segment	PAR	-111.003	-38.092	2197	SO100	Freund et al., 2013	EMP; ICPMS	Gl	61.45	1.15	13.1	8.51				0.17	1.39	4.42	4.64	1.17	0.39		0.049	0.96			97.39	17.6	9.42	43.7	2.45	12.874	2.892	22.785	85.565	2.81	24.635	16.22	105	109	812	32.7	8.067	0.073	0.162	137.985	38.758	92.59
SO100 91DS7	Foundation Segment	PAR	-111.003	-38.092	2197	SO100	Freund et al., 2013	EMP; ICPMS	Gl	61.78	1.14	13.16	8.5				0.16	1.35	4.34	4.63	1.21	0.4		0.051	0.98			97.71	17.7	9.23	50.2	2.419	14.634	3.568	25.72	91.969	2.96	25.896	17.228	112	115	865	34.6	8.719	0.092	0.168	146.912	41.133	98.368
SO100 91DS-2	Foundation Segment	PAR	-111.003	-38.0917	2197	SO100	Stroncik & Devey (2011) and Devey (unpubl.)	XRF	WR	60.06	1.282	13.23	9.4569	10.51			0.16	2.17	5.48	4.818	0.943	0.342						98.995
SO100 91DS-3	Foundation Segment	PAR	-111.003	-38.0917	2197	SO100	Stroncik & Devey (2011) and Devey (unpubl.)	XRF	WR	62.47	1.15	13.57	8.81804	9.8			0.15	1.57	4.73	5.168	1.093	0.346						100.047
SO100 91DS-4	Foundation Segment	PAR	-111.003	-38.0917	2197	SO100	Stroncik & Devey (2011) and Devey (unpubl.)	XRF	WR	60.97	1.3	13.74	9.51089	10.57			0.16	2.14	5.46	4.844	1.062	0.361						100.607
SO157 32DS1	Foundation Segment	PAR	-110.98	-38.032	2239	SO157	Haase et al., 2005; Freund et al., 2013	EMP; ICPMS; TIMS	Gl	57.35	1.49	13.52	9.75				0.16	2.87	6.46	4.24	0.79	0.36	0.017	0.125	0.552			97.68	14.9	26	169	28.922	23.069	14.669	31.644	96.66	1.89	25.164	12.457	124	94	530	24.1	5.275	0.063	0.124	116.532	27.95	68.58
SO157 29DS1	Foundation Segment	PAR	-110.969	-37.97	2239	SO157	Haase et al., 2005; Freund et al., 2013	EMP; ICPMS; TIMS	Gl	49.14	1.75	14.31	10.96				0.15	7.07	11.31	2.72	0.17	0.26	0.053	0.197	0.02			98.11	5.06	34.549	324	125	42.3	54.6	62.6	93.7	0.509	18.5	2.356	140	30.7	97.2	6.021	1.161	0.027	0.052	33.121	5.696	15.077
SO157 29DS6	Foundation Segment	PAR	-110.969	-37.97	2239	SO157	Freund et al., 2013	EMP	Gl	50.07	1.75	14.35	11.41				0.21	7.08	11.5	2.71	0.18	0.27		0.202	0.021			99.75
SO157 24DS1	Foundation Segment	PAR	-110.947	-37.903	2263	SO157	Freund et al., 2013	EMP; ICPMS; TIMS	Gl	49.84	1.52	14.67	10.16				0.13	7.57	12.02	2.56	0.15	0.25	0.055	0.178	0.017	0.41		99.14	5.37	29.1	355	219	39.5	60.5	65.2	70.4	0.436	16.9	1.996	144	26.6	86	5.908	0.83	0.005	0.015	29.278	5.515	14.151
SO157 24DS2	Foundation Segment	PAR	-110.947	-37.903	2263	SO157	Freund et al., 2013	EMP	Gl	49.57	1.56	14.67	10.44				0.2	7.63	12.07	2.59	0.17	0.25	0.067	0.215	0.021			99.45
SO157 24DS3	Foundation Segment	PAR	-110.947	-37.903	2263	SO157	Freund et al., 2013	EMP	Gl	50.04	1.56	14.55	10.49				0.18	7.54	12.12	2.56	0.16	0.25		0.132	0.019			99.6
SO157 30GTV1	Foundation Segment	PAR	-110.914	-37.791	2230	SO157	Haase et al., 2005; Freund et al., 2013	EMP; ICPMS; TIMS	Gl	52.53	2.29	13.49	13.08				0.22	3.96	8.36	3.67	0.42	0.6	0.031	0.218	0.128	0.76		99	11.4	37.1	214	93.124	29.671	24.793	37.658	126.586	1.291	24.921	6.603	150	79.4	304	19	2.59	0.04	0.071	81.984	17.475	46.349
SO157 31GTV5	Foundation Segment	PAR	-110.91	-37.776	2225	SO157	Freund et al., 2013	EMP	Gl	49.79	1.58	14.43	10.61				0.21	7.47	12.13	2.57	0.17	0.24		0.183	0.026			99.42
SO100 102DS1	Foundation Segment	PAR	-110.909	-37.77	2264	SO100	Haase et al., 2005; Maia et al., 2001; Freund et al., 2013	EMP; ICPMS; TIMS	Gl	49.4	1.85	14.48	11.27				0.2	6.93	11.42	2.81	0.19	0.28		0.142	0.025			99	6.31	28.1	375	119	39.9	52.6	60.9	78.8	0.521	18.1	2.479	151	31.1	109	7.526	1.062	0.01	0.021	35.059	6.972	17.82
SO157 18DS1	Foundation Segment	PAR	-110.883	-37.683	2239	SO157	Haase et al., 2005; Freund et al., 2013	EMP; ICPMS	Gl	59.01	1.25	13.62	8.86				0.14	1.87	5.09	4.63	1.06	0.38	0.018	0.08	0.868	1.5		96.86	18.3	11.83	81	6.363	17.709	8.157	36.929	91.678	2.54	25.943	18.491	119	102	765	33.7	6.873	0.077	0.186	160.412	39.461	91.945
SO157 18DS2	Foundation Segment	PAR	-110.883	-37.683	2239	SO157	Freund et al., 2013	EMP	Gl	57.94	1.46	13.46	10.01				0.16	2.8	6.37	4.5	0.85	0.39	0.028	0.086	0.957			99.02
SO157 17DS1	Foundation Segment	PAR	-110.877	-37.667	2226	SO157	Haase et al., 2005; Freund et al., 2013	EMP; ICPMS; TIMS	Gl	50.4	1.78	14.31	11.24				0.19	6.71	11.4	2.64	0.19	0.29	0.039	0.198	0.03	0.3		99.42	5.26	34.3	320	81.789	42.292	42.772	74.241	96.486	0.548	18.854	3.04	145	32.6	116	7.704	1.281	0.034	0.081	38.982	7.173	18.618
SO157 17DS2	Foundation Segment	PAR	-110.877	-37.667	2226	SO157	Freund et al., 2013	EMP	Gl	49.18	1.89	14.17	11.79				0.2	6.55	11.1	2.94	0.22	0.3	0.048	0.241	0.033			98.66
SO157 17DS3	Foundation Segment	PAR	-110.877	-37.667	2226	SO157	Freund et al., 2013	EMP	Gl	49.86	1.85	13.93	11.89				0.17	6.36	11.04	2.87	0.22	0.28		0.191	0.033			98.7
SO157 2DS1	Foundation Segment	PAR	-110.875	-37.666	2225	SO157	Haase et al., 2005	EMP; ICPMS; TIMS	Gl	50.44	1.74	14.15	11.46				0.21	6.83	11.42	2.87	0.21	0.28	0.027	0.228	0.025	0.45		99.9	6.14	26.6	356	78.442	38.987	38.969	66.941	74.803	0.498	17.342	2.658	142	30	107	7.75	1.107	0.013	0.022	35.878	7.116	17.88
SO100 86DS-1GLAS	Foundation Segment	PAR	-110.874	-37.6598	2230	SO100	Stroncik & Devey (2011) and Devey (unpubl.); Maia et al. (2001)	XRF; ICPMS; TIMS	Gl	62.22	1.053	13.43	8.5301	9.48			0.14	1.49	4.48	5.014	1.407	0.293						99.007	13.8266	14.2134		9.10474	18.9362	1.81418	37.719	112.664		22.8353	18.4093	119.98	118.287	714.34	36.3092			0.200728	160.934	41.4432	97.5355
SO100 86DS-3	Foundation Segment	PAR	-110.874	-37.6598	2230	SO100	Stroncik & Devey (2011) and Devey (unpubl.)	XRF	WR	60.48	1.403	13.71	9.47489	10.53			0.15	2.42	5.87	4.584	0.845	0.327						100.319
SO100 86DS-4	Foundation Segment	PAR	-110.874	-37.6598	2230	SO100	Stroncik & Devey (2011) and Devey (unpubl.)	XRF	WR	61.33	1.281	13.76	9.51089	10.57			0.16	1.89	5.27	4.908	1.101	0.378						100.648
SO100 86DS-5GLAS	Foundation Segment	PAR	-110.874	-37.6598	2230	SO100	Stroncik & Devey (2011) and Devey (unpubl.)	XRF; ICPMS	Gl	62.86	1.077	13.66	8.72806	9.7			0.15	1.51	4.6	4.985	1.269	0.303						100.114	14.6185	11.6991		4.42435	16.164	1.0221	32.0336	104.062		22.8956	21.0896	109.154	121.317	738.701	37.0718			0.242784	172.779	43.4855	101.418
SO100 86DS-6	Foundation Segment	PAR	-110.874	-37.6598	2230	SO100	Stroncik & Devey (2011) and Devey (unpubl.)	XRF	WR	60.75	1.325	13.88	9.08798	10.1			0.14	2.2	5.49	4.697	0.924	0.354						99.86
SO100 86DS-7	Foundation Segment	PAR	-110.874	-37.6598	2230	SO100	Stroncik & Devey (2011) and Devey (unpubl.)	XRF	WR	61.18	1.136	13.42	8.96201	9.96			0.15	1.69	4.86	4.916	1.42	0.322						99.054
SO100 86DS2	Foundation Segment	PAR	-110.874	-37.66	2230	SO100	Haase et al., 2005; Freund et al., 2013	EMP; ICPMS; TIMS	Gl	59.82	1.29	13.67	9.27				0.16	1.77	5.17	4.52	1.1	0.41		0.046	0.983			98.2	17.3	10.8	70.4	6.82	16.375	6.225	33.511	86.943	2.59	24.297	17.432	111	99	729	33.1	6.828	0.085	0.183	152.04	38.627	90.286
SO157 3DS1	Foundation Segment	PAR	-110.872	-37.659	2221	SO157	Haase et al., 2005; Freund et al., 2013	EMP; ICPMS; TIMS	Gl	61.95	1.02	13.54	7.97				0.12	1.57	4.47	4.49	1.27	0.29	0.028	0.06	0.963			97.73	18.5	15.13	68.9	4.164	14.537	6.048	32.906	84.13	2.65	26.549	22.081	107	109	714	33.4	7.63	0.11	0.231	178.997	41.282	96.779
SO157 3DS4	Foundation Segment	PAR	-110.872	-37.659	2221	SO157	Freund et al., 2013	EMP	Gl	62.4	1.02	13.52	8.1				0.13	1.54	4.44	4.47	1.25	0.28		0.053	0.918			98.13
SO157 3DS6	Foundation Segment	PAR	-110.872	-37.659	2221	SO157	Freund et al., 2013	EMP	Gl	61.99	1.06	13.1	8.38				0.13	1.13	4.06	4.59	1.36	0.34		0.036	1.035			97.21
SO157 4DS1	Foundation Segment	PAR	-110.868	-37.635	2213	SO157	Freund et al., 2013	EMP	Gl	60.58	1.28	13.35	9.06				0.15	1.65	4.76	4.5	1.11	0.39	0.024	0.09	1.011			97.95
SO157 4DS5	Foundation Segment	PAR	-110.868	-37.635	2213	SO157	Freund et al., 2013	EMP	Gl	62.09	1.03	13.35	8.35				0.16	1.67	4.76	4.66	1.2	0.28		0.039	0.953			98.53
SO157 15DS1	Foundation Segment	PAR	-110.863	-37.618	2210	SO157	Freund et al., 2013	EMP; ICPMS; TIMS	Gl	58.87	1.42	13.67	9.79				0.17	1.99	5.45	4.59	1.01	0.48	0.02	0.086	0.972	0.51		98.52	16.4	19.77	95.6	8.761	18.694	6.623	35.405	97.66	2.66	25.123	16.577	117	105	654	33.7	6.35	0.091	0.177	151.126	37.132	89.706
SO157 15DS2	Foundation Segment	PAR	-110.863	-37.618	2210	SO157	Freund et al., 2013	EMP	Gl	58.4	1.46	13.55	10.15				0.15	1.96	5.43	4.51	1.03	0.49	0.035	0.108	0.943			98.23
SO157 15DS3	Foundation Segment	PAR	-110.863	-37.618	2210	SO157	Freund et al., 2013	EMP	Gl	58.54	1.46	13.43	10.33				0.18	1.99	5.61	4.48	1.02	0.5		0.087	0.95			98.57
SO157 15DS4	Foundation Segment	PAR	-110.863	-37.618	2210	SO157	Freund et al., 2013	EMP	Gl	58.97	1.43	13.61	10.17				0.18	2	5.58	4.41	1.02	0.47		0.097	0.923			98.87
SO157 5DS1	Foundation Segment	PAR	-110.856	-37.606	2238	SO157	Haase et al., 2005; Freund et al., 2013	EMP	Gl	56.42	1.6	13.94	10.53				0.17	3.12	6.77	3.98	0.79	0.38	0.017	0.151	0.577			98.43	14.2	17.9	202	29.873	25.745	18.87	43.914	86.169	1.75	22.138	11.492	126	74	498	23.1	4.327	0.059	0.12	110.556	26.305	62.196
SO157 5DS2	Foundation Segment	PAR	-110.856	-37.606	2238	SO157	Freund et al., 2013	EMP	Gl	55.81	1.56	14.01	10.27				0.13	3.07	6.67	4.15	0.81	0.39	0.033	0.147	0.59			97.63
SO157 5DS5	Foundation Segment	PAR	-110.856	-37.606	2238	SO157	Freund et al., 2013	EMP	Gl	55.92	1.58	13.91	10.29				0.14	3.06	6.76	4.16	0.81	0.4		0.12	0.591			97.73
SO157 6DS1	Foundation Segment	PAR	-110.826	-37.562	2246	SO157	Haase et al., 2005; Freund et al., 2013	EMP; ICPMS	Gl	57.72	1.55	12.72	12				0.21	1.9	5.64	4.4	0.74	0.56	0.029	0.17	1.147			98.77	14.2	22.2	92.6	9.849	19.86	8.328	34.046	103.108	1.91	26.988	10.845	134	114	569	36.5	4.12	0.062	0.109	128.591	33.354	83.04
SO157 6DS2	Foundation Segment	PAR	-110.826	-37.562	2246	SO157	Freund et al., 2013	EMP	Gl	57.19	1.57	12.7	11.96				0.2	2.01	5.71	4.66	0.74	0.54	0.038	0.161	1.138			98.6
SO100 85DS1	Foundation Segment	PAR	-110.803	-37.487	2260	SO100	Haase et al., 2005; Freund et al., 2013; Devey (Iso., unpubl.)	EMP; ICPMS; TIMS	Gl	50.13	1.61	14.55	10.17				0.15	7.43	12.14	2.71	0.17	0.25		0.138	0.006			99.45	4.99	25.8	339	174.036	37.138	51.983	67.459	67.459	0.435	16.11	1.818	144	24.6	93	6.242	0.938	0.016	0.01	36.892	6.41	16
SO100 105DS1	Foundation Segment	PAR	-110.707	-37.191	2409	SO100	Haase et al., 2005; Freund et al., 2013	EMP; ICPMS; TIMS	Gl	55.54	2.09	12.24	15.24				0.27	2.03	6.5	3.35	0.63	0.81		0.164	0.151			99.02	16.8	16.2	32.7	1.072	20.07	1.482	15.989	163.847	1.808	26.573	10.063	144	97.6	440	26.8	3.729	0.05	0.107	113.403	25.781	64.949
SO100 105DS-2	Foundation Segment	PAR	-110.707	-37.1911	2409	SO100	Stroncik & Devey (2011) and Devey (unpubl.)	XRF	Gl	55.81	1.966	12.43	14.9817	16.65			0.28	1.87	6.48	3.972	0.995	0.754						101.207
SO100 105DS-3	Foundation Segment	PAR	-110.707	-37.1911	2409	SO100	Devey (ME, unpubl.); Hekinian et al., 1997	XRF	WR	54.97	2.137	12.18	15.6475	17.39			0.3	2.04	6.45	3.954	0.938	0.701						101.06			30	116	20	4.8					12.8	133	100	393	26.1				105	24.9	64
SO100 106DS2	Foundation Segment	PAR	-110.632	-36.907	2475	SO100	Haase et al., 2005; Freund et al., 2013	EMP; ICPMS; TIMS	Gl	50.79	3.55	12.32	16.47				0.25	3.92	8.5	3.25	0.43	0.49		0.227	0.101			100.3	10.6	23.1	466	10.049	39.193	14.499	39.535	126.681	1.103	21.87	6.118	142	56.3	249	18.385	2.167	0.036	0.063	72.292	15.761	39.078
SO100 106DS3	Foundation Segment	PAR	-110.632	-36.907	2475	SO100	Freund et al., 2013	EMP; ICPMS; TIMS	Gl	50.39	3.58	12.46	16.5				0.25	3.67	8.1	3.45	0.45	0.52		0.227	0.105			99.69	10.6	23.6	471	15.121	39.727	15.783	40.438	126.83	1.106	21.712	6.027	142	56.2	228	18.292	2.178	0.065	0.059	72.537	15.81	39.041
SO100 106DS-1GLAS	Foundation Segment	PAR	-110.632	-36.9066	2475	SO100	Devey (ME, Isotopes, unpubl.); Hekinian et al., 1997 (TE)	XRF; ICPMS; TIMS	Gl	50.03	1.555	14.33	11.3105	12.57			0.2	7.13	11.27	2.503	0.113	0.166						99.867			317	210	39.8	82.1					1.6	86.4	39.4	110	4.3				15	4.6	12.8
Atalante FH DR 10-05	Foundation Segment	PAR	-110.527	-36.501	2820	Hotline (Atalante)	Haase et al., 2005; Freund et al., 2013	EMP; ICPMS; TIMS	Gl	50.85	1.3	14.28	10.23				0.18	7.66	12.3	2.28	0.08	0.13		0.296	0.002			99.6	5.27	27.3	322	209.301	37.654	70.158	67.756	62.729		15.104	1.079	85.1	22.8	54.3	2.55			0.003	13.328	2.654	7.472
FH10-05	Foundation Segment	PAR	-110.526	-36.5007	2820	Hotline (Atalante)	Hekinian et al., 1999; Maia et al., 2001	EMP; ICPMS; TIMS	Gl	50.25	1.71	14.13	10.89				0.1	7.19	11.74	2.75	0.13	0.07						99		47.45		347.17	57.31	103.07	99.34	90.3			1	98	25.49	69.97	3.39				14.89	3.17	8.81
FH10-07	Foundation Segment	PAR	-110.526	-36.5007	2820	Hotline (Atalante)	Hekinian et al., 1999	EMP	Gl	50.9	1.3	14.09	10.2				0.24	7.68	12.36	2.33	0.08	0.07						99.26
FH10-08	Foundation Segment	PAR	-110.526	-36.5007	2820	Hotline (Atalante)	Hekinian et al., 1999	EMP	Gl	50.78	1.32	14.11	10.55				0.12	7.69	12.37	2.27	0.05	0.17						99.47
FH10-09	Foundation Segment	PAR	-110.526	-36.5007	2820	Hotline (Atalante)	Hekinian et al., 1999	EMP	Gl	50.06	1.75	13.99	11.12				0.16	7.24	11.64	2.77	0.11	0.13						99.06
SO213 4VSR-a	TJ Segment	PAR	-110.958	-35.9865	2492	SO213	this study	EMP	Gl	49.48	1.78	15.47	9.89				0.18	7.38	11.57	2.96	0.31	0.25		0.17	0.01			99.47
SO213 4VSR-b	TJ Segment	PAR	-110.958	-35.9865	2492	SO213	this study	EMP; ICPMS; TIMS	Gl	49.41	1.82	15.35	9.9				0.2	7.38	11.61	2.94	0.3	0.23		0.17	0.01			99.32	6.41	43.17	322.2	291.3	44.04	95.81	73.18	92.08			2.89	157.9	37.19	148.8	8.23				30.65	7.6	19.59
SO213 5VSRb	TJ Segment	PAR	-110.935	-36.197	2461	SO213	this study	EMP; ICPMS	Gl	50.92	1.54	14.37	10.41				0.2	7.45	12.02	2.6	0.08	0.13		0.18	0.02			99.93	6.28	47.61	375.8	198	45.32	70.62	77.17	91.72			0.52	114.6	33.83	96.55	2.09				6.3	3.22	10.28
SO213 3VSRa	TJ Segment	PAR	-110.927	-35.858	2453	SO213	this study	EMP; ICPMS; TIMS	Gl	50.53	1.57	14.57	10.36				0.22	7.58	12.06	2.74	0.09	0.12		0.18	0.01			100.05	6.37	48.15	375.7	228.2	46.24	75.45	79.1	92.52			0.52	115.2	34.59	96.24	2.06				6.39	3.09	9.99
SO213 3VSRb	TJ Segment	PAR	-110.927	-35.858	2453	SO213	this study	EMP	Gl	50.57	1.57	14.51	10.18				0.21	7.57	11.91	2.7	0.1	0.13		0.18	0.01			99.64
SO213 2VSRa	TJ Segment	PAR	-110.913	-35.709	2489	SO213	this study	EMP	Gl	50.63	1.24	15.21	9.04				0.18	8.27	12.77	2.44	0.07	0.11		0.15	0.01			100.14
SO213 2VSRb	TJ Segment	PAR	-110.913	-35.709	2489	SO213	this study	EMP; ICPMS; TIMS	Gl	50.54	1.23	15.37	8.88				0.17	8.48	12.62	2.46	0.08	0.09		0.15	0.01			100.1	5.12	45.09	312.7	418.4	45.88	109.9	88.69	75.03			0.45	118.5	25.85	72.9	1.6				5.36	2.48	7.89
SO213 1VSRb	TJ Segment	PAR	-110.877	-35.564	2511	SO213	this study	EMP; ICPMS	Gl	49.74	1.6	14.56	10.61				0.21	7.44	11.92	2.73	0.09	0.14		0.19	0.02			99.27	6.52	47.9	379.7	197.2	46.69	71.3	79.27	94.34			0.51	109.7	34.79	95.53	1.98				6.25	3	9.78
EN112 3D-1	TJ Segm. Off-axis	PAR	-110.717	-35.617	2730		Michael & Chase, 1987			50.48	1.92	14.24	10.1138		11.24			6.77	11.71	2.72	0.12	0.18
FH5-02	Seamount SW' Buffon	Selkirk MP	-126.23	-34.9185	3350	Hotline (Atalante)	Hekinian et al., 1999; Maia et al., 2001	ICPMS; TIMS	Gl																					53.15		151.4	49.37	38.36	54.08	172.85			10.22	453.11	48.03	354.52	28.29				152.75	25.14	61.55
FH5-04	Seamount SW' Buffon	Selkirk MP	-126.23	-34.9185	3350	Hotline (Atalante)	Hekinian et al., 1999; Maia et al., 2001	ICPMS; TIMS	Gl																					38.69		102.17	43.64	36.46	52.56	166.54			9.96	456.16	45.94	344.86	27.34				150.75	24.53	60.63
FH5-03	Seamount SW' Buffon	Selkirk MP	-126.23	-34.9185	3350	Hotline (Atalante)	Hekinian et al., 1999	EMP; ICPMS	Gl	49.2	4.29	13.32	13.01				0.25	4.44	9.24	2.57	1.07	0.71						98.13		41.2		103.79	49.08	37.8	54.55	174.63			10.35	467.49	49.61	370.1	29.17				157.15	26	64.29
FH6-01	Seamount S' Buffon	Selkirk MP	-125.273	-34.5667	2979	Hotline (Atalante)	Hekinian et al., 1999; Maia et al., 2001	EMP; ICPMS; TIMS	Gl	47.36	3.2	15.65	10.63				0.16	6.11	9.87	3.56	0.83	0.55						97.97		33.91		231.59	53.93	141.48	46.53	126.08			12.54	461.12	37.56	262.83	32.86				156.16	24.95	54.55
REFERENCES	Freund et al., 2013	Freund, S., Beier, C., Krumm, S., and Haase, K. M. (2013). Oxygen isotope evidence for the formation of andesitic–dacitic magmas from the fast-spreading Pacific–Antarctic Rise by assimilation–fractional crystallisation. Chemical Geology 347, 271–283. doi: 10.1016/j.chemgeo.2013.04.013
	Haase et al., 2005	Haase, K. M., Stroncik, N. A., Hékinian, R., and Stoffers, P. (2005). Nb-depleted andesites from the Pacific-Antarctic Rise as analogs for early continental crust. Geology 33, 921–924. doi: 10.1130/G21899.1
	Hekinian et al., 1997	Hékinian, R., Stoffers, P., Devey, C., Ackermand, D., Hemond, C., O’Connor, J., et al. (1997). Intraplate versus ridge volcanism on the Pacific-Antarctic Ridge near 37 S-111 W. Journal of Geophysical Research 102, 12265-12–286.
	Hekinian et al., 1999	Hékinian, R., Stoffers, P., Ackermand, D., Révillon, S., Maia, M., and Bohn, M. (1999). Ridge–hotspot interaction: the Pacific–Antarctic Ridge and the foundation seamounts. Marine Geology 160, 199–223. doi: 10.1016/S0025-3227(99)00027-4
	Maia et al., 2001	Maia, M., Hemond, C., and Gente, P. (2001). Contrasted interactions between plume, upper mantle, and lithosphere: Foundation chain case. Geochemistry Geophysics Geosystems 2. doi: 10.1029/2000GC000117
	Michael & Chase, 1987	Michael, P., and Chase, R. (1987). The influence of primary magma composition, H 2 O and pressure on mid-ocean ridge basalt differentiation. Contributions to Mineralogy and Petrology 96, 245–263.
	Stroncik & Devey, 2011	Stroncik, N. A., and Devey, C. W. (2011). Recycled gabbro signature in hotspot magmas unveiled by plume–ridge interactions. Nature Geoscience 4, 393–397. doi: 10.1038/ngeo1121
UNPUBLISHED	Data includes previously unreleased data. However, this data has been acquired along with data published previously:
	Devey (unpublished)	Methods for trace element analyses described in Stroncik & Devey (2011), isotope analyses follow Maia et al. (2001)
	Haase (unpublished)	Methods described in Haase et al., (2005)
	This study	See text for details
Abbreviations	Gl	Glass
	WR	Whole rock
	EMP	Electron probe micro-analysis
	ICPMS	Inductively coupled plasma mass spectrometry
	TIMS	Thermal ionization mass spectrometry
	XRF	X-ray fluorescence
	ME	Major elements
	TE	Trace elements
	Iso	Isotopes
[truncated: 24 more columns]

## Sheet: S3 - Isotope reference material
		NBS-987	La Jolla	NBS-981
		87Sr/86Sr	143Nd/144Nd	206Pb/204Pb	207Pb/204Pb	208Pb/204Pb
This study	Measured	0.71025	0.51185	16.9408	15.4981	36.7225
	2σ	9.1045e-06	5.31814e-06	0.00129786	0.00143399	0.00369589
	N	14	12	48	48	48
Haase et al., 2005	Measured	0.710249	0.511827	16.906	15.45	36.568	Analytical details described in Haase et al., 2002
	2σ	2.5e-05	7e-06	no 2σ reported			for Pb see long-term reproducibility MAT262 at GEOMAR in Kokfelt et al., 2006
	norm.	0.71025	0.511855	16.9356	15.4891	36.7006	(Todt et al., 1996)
Freund et al., 2013	Measured	0.710218	0.511827
	2σ	2.4e-05	7e-06
	N	12	3
	norm.	0.71025	0.511855
Unpublished SO-100 data generated on MAT262 at GEOMAR	2σ, inferred	2.5e-05	9e-06	0.006	0.007	0.022	Long-term reproducibility MAT262 at GEOMAR, see Kokfelt et al., 2006
LITERATURE DATA
Foundation
Maia et al., 2001	Measured			16.904*			*we assume this to be a measured value only (prior to mass bias correction)
	2σ			0.014
PAR segments N1-N6
Hamelin et al., 2010, 2011	Measured/Norm.	0.710251	x-cal. with Jndi-1	16.9432	15.5004	36.7326
	2σ	1.6e-05	4e-06	0.0027	0.0029	0.0086
	norm.	0.71025	0.511852	16.9373	15.4925	36.7054	(Todt et al., 1984)
References
Freund, S., Beier, C., Krumm, S. & Haase, K. M. Oxygen isotope evidence for the formation of andesitic–dacitic magmas from the fast-spreading Pacific–Antarctic Rise by assimilation–fractional crystallisation. Chemical Geology 347, 271–283 (2013).
Haase, K. M., Stroncik, N. A., Hékinian, R. & Stoffers, P. Nb-depleted andesites from the Pacific-Antarctic Rise as analogs for early continental crust. Geology 33, 921–924 (2005).
Haase, K. M., Worthington, T. J., Stoffers, P., Garbe-Schönberg, D. & Wright, I. Mantle dynamics, element recycling, and magma genesis beneath the Kermadec Arc‐Havre Trough. Geochemistry Geophysics Geosystems 3, 1–22 (2002).
Hamelin, C. et al. Geochemical portray of the Pacific Ridge: New isotopic data and statistical techniques. Earth and Planetary Science Letters 302, 154–162 (2011).
Hamelin, C., Dosso, L., Hanan, B., Barrat, J.-A. & Ondréas, H. Sr-Nd-Hf isotopes along the Pacific Antarctic Ridge from 41 to 53°S. Geophysical Research Letters 37, L10303 (2010).
Kokfelt, T. F. et al. Combined trace element and Pb-Nd–Sr-O isotope evidence for recycled oceanic crust (upper and lower) in the Iceland mantle plume. Journal of Petrology 47, 1705–1749 (2006).
Maia, M., Hemond, C. & Gente, P. Contrasted interactions between plume, upper mantle, and lithosphere: Foundation chain case. Geochemistry Geophysics Geosystems 2, (2001).
Todt, W., Cliff, R. A., Hanser, A. & Hofmann, A. W. Evaluation of a 202Pb-205Pb double spike for high-precision lead isotope analysis. In: Geophysical Monograph (eds. Hart, S. & Basu, A.) 95. Earth Processes: Reading the Isotopic Code, 429–437 (American Geophysical Union, 1996).
Todt, W., Cliff, R.A., Hanser, A., Hofmann, A.W. 202Pb-205Pb double spike for lead isotopic analyses. Terra Cognita 4(2), ECOG VIII, Braunlage, pp. 209 (1984) .
